# Supplementary material for: Where Does the EU-Path on NGTs Lead Us?
Source: Preprints.org preprint supplement (doi:10.20944/preprints202311.1897.v1), 2023-11-30
Supplement: Supplementary file 1 [file supplementary]

## Sheet: Methods for case study analysis
Analyzed Data sets:		References
	(1) 148 plant applications of Gelinsky 2022; supplemented with further updated information available (literature screening)	Gelinsky, Eva (2022): Neue gentechnische Verfahren: Kommerzialisierungspipeline im Bereich Panzenzüchtung und Lizenzvereinbarungen. Im Auftrag des Bundesamtes für Umwelt (BAFU). Hg. v. Bundesamt für Umwelt (BAFU), Sektion Biotechnologie. Baldegg.
	(2) 209 APHIS 'Am I regulated?' requests (2011-2020) and APHIS 'confirmation request' (2021-2023)	https://www.aphis.usda.gov/aphis/ourfocus/biotechnology/regulated_article_letters_of_inquiry/regulated_article_letters_of_inquiry https://www.aphis.usda.gov/aphis/ourfocus/biotechnology/regulatory-processes/confirmations/responses/cr-table
Note: 74 plant applications listed in Gelinsky 2022 (1) show an APHIS application and therefore can also be found in the list of APHIS requests (2)
Citeria for Categorization of NGT plant applications according to AnnexI
NGT1	According to Annex I of the NGT EC proposal (European Commission 2023a) a plant application was categorized as NGT1: '[...] it differs from the recipient/parental plant by no more than 20 genetic modifications of the types referred to in points 1 to 5, in any DNA sequence sharing sequence similarity with the targeted site that can be predicted by bioinformatic tools. (1) substitution or insertion…
i. NGT1	A Plant was categorized as infered (i. NGT1) if only limited information was available, but the method used indicated insertions, substitutions or deletions and where (I) additional information were available indicating that no transgenic DNA was introduced during the modification process or (II) information were available on the number of modified genes that fell below the limit of 20 modificati…
NGT2	A plant application is categorized as NGT2 if the criteria in Annex I (European Commission 2023a; see criteria NGT1) have not been fulfilled, but no transgenic nucleotide sequence has been introduced into the organism.
i. NGT2	A plant application was categorized as inferred NGT2 (i. NGT2), if only limited information were available, but in the method used (I) nucleotide sequences from the "breeder's gene pool" were introduced into endogenous genes, or (II) more than 20 modifications were targeted.
Transgenic	A plant application was categorized as trangsgenic if at least one transgenic nucleotide sequence was introduced into the organism or clearly a classical genetic technique was used.
no category	Plant applications were labeld as 'not categorizable', if there was no sufficient information of the used methodology, as well as number and type of modification.
Categorization of plant application traits
	Plant applications with multiple traits were sorted to the respective categories and therefore can be listed in more than one category.
	The total number of plant aplication traits thus exceeds the number of total NGT1/i.NGT1 plant applications.
Consumption-oriented	including traits regarding nutrient content, secondary metabolites, and olfactory and/or visual modifications
Industry	including traits regarding modified content, traits related to transportation and storage, and usage for bioenergy
Plant development and cultivation	including traits regarding harvest, reproduction, growth, yield
Biotic stress tolerance	including traits regarding tolerance against nematodes, bacteria, viruses, and unspecified biotic stressors
Abiotic stress tolerance	including traits regarding drought and/or salt tolerance
Herbicide resistance	including traits regarding herbicide resitance

## Sheet: TableS1 Gelinsky  2022 
			Category (NGTs)
	NGT1	inferred NGT1	NGT2	inferred NGT2	Transgenic	Not categorizable
total amount	60	20	1	4	15	48
total amount [%]	40.5405	13.5135	0.675676	2.7027	10.1351	32.4324
NGT1 or NGT2 [%]	94.1176		5.88235
Category	Plant	Trait by Gelinsky et al. 2022	Molecular characterization	Trait	Company by Gelinsky et al. 2022	Reference	Case number
Transgenic	False flax	Non-public, maybe higher yield	Transgene (Insertion of an algae gene (non-public))	Yield	Yield10 Bioscience (USA)	https://enveurope.springeropen.com/articles/10.1186/s12302-021-00482-2	G57
Transgenic	False flax	Production of polyhydroxyalkanoates (PHA), bioplastics	Transgene (insertion of three bacterial genes)	Modified content	Yield10Bioscience (USA)	https://www.annualreports.com/Click/23849	G59
Transgenic	Soybean	Yield	Transgene (insertion of one algae gene (non-public) or one gene of false flax (non-public))	Yield	Yield10 Bioscience (USA), Bayer Crop Science (DEU)	https://www.annualreports.com/HostedData/AnnualReportArchive/y/NASDAQ_YTEN_2018.pdf	G70
Transgenic	Maize	Growth, short stature	Transgene (insertion of GA20ox_SUP suppression cassette)	Growth	Bayer CropScience (GER)	https://www.aphis.usda.gov/brs/pdf/rsr/22-152-01rsr-review-response.pdf https://www.aphis.usda.gov/brs/pdf/rsr/22-152-01rsr-review-submission.pdf	G93
Transgenic	Potato	Starch content	Transgene (insertion of the reverse GBSS gene with promoter)	Modified content	Lyckeby Starch AB (SWE)	https://www.saveourseeds.org/fileadmin/files/SOS/Dossiers/Mon_863/Amylogene_starch_potato_original_application.pdf	G106
Transgenic	Potato	Pathogen resistance	Transgene (T-DNA insertion in CHL1 or DMR6 or insertion of RNAi to regulated a mannanase gene)	Biotic stress tolerance: unspecific	Swedish University of Agricultural Sciences SLU, Department of Plant Protection Biology (SWE)	https://webgate.ec.europa.eu/fip/GMO_Registers/GMO_Summary.php?NotificationNum=B/SE/20/1726&Cat=gmp	G107
Transgenic	Potato	Bacteria or virus resistance, reduced sugar content	Transgene (insertion of diverse transgenes)	diverse traits	TSL Potato Partnership Project (The Sainsbury Laboratory), University of Leeds (GBR), J. R. Simplot, BioPotatoes UK Ltd (USA, GBR)	https://www.aphis.usda.gov/brs/pdf/rsr/21-270-01rsr-review-response.pdf https://www.aphis.usda.gov/brs/pdf/rsr/21-270-01rsr-review-submission.pdf	G108
Transgenic	Sorghum	Yield/ Drought tolerance, diverse traits	Transgene (overexpression of two transcription factors PvBMY1 and PvBMY3)	Yield	Yield10Bioscienc e (USA), Forage Genetics (USA)	https://news.agropages.com/News/NewsDetail---26278.htm https://www.sciencedirect.com/science/article/am/pii/S0168945217312360	G119
Transgenic	Apple	Modified content, (increased anthocyanin content)	Non-public - most likely grafted and therefore GMO	Olfactory and visual modification	Stichting Dienst Land-bouwkundig Onderzoek (DLO) et al. (NLD)	-	G136
Transgenic	Apple	Fire blight (bacteria) resistance	Transgene (insertion of FBMR5)	Bacteria resistance	ETH Zürich (CH), Agroscope (CH)	https://doi.org/10.17660/ActaHortic.2021.1307.37	G137
Transgenic	Apple	Scab (fungi) resistance	Transgene (insertion of HcrVf1 and HcrVf2)	Fungi resistance	ETH Zürich (CH), Universität Wageningen (NLD)	DOI 10.1007/s11103-011-9749-1 https://www.aphis.usda.gov/biotechnology/downloads/reg_loi/aphis_response_schouten.pdf	G138
Transgenic	Walnut	Crown Gall disease (bacteria) resistance	Transgene (insertion of RNAi construct with gen sequences of Agrobacterium tumefaciens)	Bacteria resistance	Department of Pomology, University of California (USA)	https://www.sciencedirect.com/science/article/pii/S0168945202001644?via%3Dihub	G143
Transgenic	Sorghum	unspecific (yield or modified compositions), utilization for bioenergy	Transgene (ten genes (CBI) are modified with CRISPR-Cas. CRISPR remains in the plants)	Bioenergy	University of Georgia, College of Agricultural & Environmental SciencesCenter for Applied Genetic Technologies (USA)	https://www.aphis.usda.gov/biotechnology/downloads/reg_loi/20-062-04_air_cbidel.pdf https://www.aphis.usda.gov/biotechnology/downloads/reg_loi/20-062-04_air_response_signed.pdf	G148
Transgenic	Maize	Yield	Substitution of two amino acids (CBI)	Yield	Benson Hill Biosystems (USA)	https://www.aphis.usda.gov/biotechnology/downloads/reg_loi/17-298-01_air_response_signed.pdf https://www.aphis.usda.gov/biotechnology/downloads/reg_loi/17-298-01_air_inquiry_cbidel.pdf	G99
Transgenic	Maize	Yield, photosynthetic performance	Insertion of one gene (CBI)	Yield	Benson Hill Biosystems (USA), Beck‘s (USA)	https://www.aphis.usda.gov/biotechnology/downloads/reg_loi/15-013-01air_resp.pdf https://www.aphis.usda.gov/biotechnology/downloads/reg_loi/15-013-01air.pdf	G100
NGT1	Rapeseed	Increased protein content, reduced glucosinolate content, reduced phytate	Insertion and deletion in glucosinolate and phytase metabolism	Nutrient content, Secondary metabolites, Olfactory and visual modification	Corteva (USA)	https://www.aphis.usda.gov/biotechnology/downloads/reg_loi/20-168-09_air_inquiry_a1_cbidel.pdf	G6
NGT1	Soybean	Altered fatty acid composition	Deletion in FAD2 (fatty acid desaturase 2)	Modified content, Nutrient content	Calyxt Inc. (USA)	https://www.annualreviews.org/doi/10.1146/annurev-ento-120709-144755 http://www.aphis.usda.gov/biotechnology/downloads/reg_loi/cellectis_air_fad2k0_soy_cbidel.pdf	G9
NGT1	Soybean	Altered fatty acid composition	Deletion in FAD2, -3 (fatty acid desaturase 2 und 3)	Modified content, Nutrient content	Calyxt Inc. (USA)	https://www.annualreviews.org/doi/10.1146/annurev-ento-120709-144755 http://www.aphis.usda.gov/biotechnology/downloads/reg_loi/15-071-01air.pdf	G10
NGT1	Soybean	Altered fatty acid composition	CBI	Modified content, Nutrient content	Calyxt Inc. (USA)	https://www.aphis.usda.gov/aphis/ourfocus/biotechnology/regulated_article_letters_of_inquiry/regulated_article_letters_of_inquiry/!ut/p/z1/lZFdC4IwFIZ_UWxaWF2qDDTUoFzabsaoaYM1bc2gfn3rNknt3BwOPO_5eA8goAREsYeomRGNYtLWR-LRZLsInWAPbUYB9NFumSIUuzCDoBgEnDkg_-kPkWeBHOfZygnitTtND3-ED_-d3wPIcPvN2ADroKvTMK0BaZm5zISqGlBqXneSGX6mTBtxkpxKbgzXd9pUVKhbJ_RzIlUAMrjD5wdfQN_ksTPbK8a4fCURFPEbx6E_yQ!!/# Kawall, 2021:…	G11
NGT1	Soybean	Herbicide resistance (ALS)	Substitution in ALS (acetolactate synthase; GLYMA04G196100)	Herbicide resistance gene modification	Bioheuris (ARG), Santa Rosa Semillas (ARG), Grupo Don Mario (ARG)	https://www.aphis.usda.gov/biotechnology/downloads/confirmation-response/20-317-01cr_a2.pdf https://euginius.eu/euginius/pages/gmo_detail.jsf?gmoname=GE-ALS1+soybean	G14
NGT1	Soybean	Increased oil and protein content	Substitution in DGAT1b (diacyglycerol acetyltransferase)	Nutrient content	Corteva (USA)	https://www.aphis.usda.gov/biotechnology/downloads/reg_loi/20-168-14_air_inquiry_nocbi.pdf	G18
NGT1	Soybean	Soybean cyst nematode (SCN) resistance	Insertion or deletion in one gene (CBI)	Nematode resistance	Evogene (ISR), TMG – Tropical Melhoramento & Gen8tica (BRA)15	https://www.aphis.usda.gov/biotechnology/downloads/reg_loi/19-218-02_a2_air_inquiry_cbidel.pdf	G20
NGT1	Soybean	Increased oleic acid content	Point mutation, insertion or deletion in FAD2 (fatty acid desaturase 2)	Nutrient content	ToolGen Inc. (Süd- Korea) _x000D_ “Toolgen in Seoul, South Korea, has used CRISPR to generate color-modified petunias, high-oleic acid soybeans and browning-inhibited potatoes, “but they are not on sale yet because the domestic regulatory policy for CRISPR genome-edited crops has not been established,” says Yein Joen, a researcher at the company.”16	https://euginius.eu/euginius/pages/gmo_detail.jsf?gmoname=GE-HO-0+Soybean https://www.aphis.usda.gov/biotechnology/downloads/reg_loi/20-093-01-a1-air-inquiry-cbidel.pdf,	G21
NGT1	Maize	Increased amylopectin content (starch)	Deletion in Wx1 (WAXY-1 Geb)	Modified content, Nutrient content	Corteva (USA)	https://www.aphis.usda.gov/biotechnology/downloads/reg_loi/15-352-01_air_inquiry_cbidel.pdf, https://cban.ca/wp-content/uploads/GM-Waxy-Corn-Corteva-product-profile-CBAN.pdf Gao et al. 2020: https://www.nature.com/articles/s41587-020-0444-0	G24
NGT1	Maize	Drought tolerance and yield stability	Substitution of 3-4 bp in one gene (CBI)	Drought tolerance, Yield	Corteva (USA)	https://www.aphis.usda.gov/biotechnology/downloads/reg_loi/20-168-23_air_inquiry_a1_cbidel.pdf https://www.aphis.usda.gov/biotechnology/downloads/reg_loi/20-168-23_air_response_signed.pdf	G25
NGT1	Maize	Increased protein content	Substitution or insertion in M28 promoter region	Yield	Corteva (USA)	https://www.aphis.usda.gov/biotechnology/downloads/reg_loi/20-168-20_air_inquiry_cbidel.pdf https://doi.org/10.1073/pnas.1902593116	G26
NGT1	Maize	Increased yield	Substitution in FEA2-3 (fasciated ear3)	Yield	Corteva (USA)	https://www.aphis.usda.gov/biotechnology/downloads/reg_loi/20-168-12_inquiry_nocbi.pdf	G27
NGT1	Rice	Bacteria blight resistance	Insertion or deletion in promoter region of SWEET11, SWEET13 or SWEET14	Bacteria resistance	International Rice Research Institute (IRRI), International Center of Tropical Agriculture (CIAT)	https://www.nature.com/articles/s41587-019-0267-z	G30
NGT1	Potato	Black spotting resistance "non-browning"	Insertion, deletion, substitution in PPO (polyphenol oxidase) genes	Olfactory and visual modification, Storage and transport	Simplot Plant Sciences (USA)	https://euginius.eu/euginius/pages/gmo_detail.jsf?gmoname=GE-Low+PPO+Potato https://www.aphis.usda.gov/biotechnology/downloads/reg_loi/20-168-01_air_inquiry_cbidel.pdf https://www.aphis.usda.gov/biotechnology/downloads/reg_loi/20-168-01_air_response_signed.pdf	G36
NGT1	Potato	reduced PPO content/ reduced glycoalkaloid content	1. Insertion, deletion, substitution in PPO (polyphenol oxidase) genes and 2. CBI	Olfactory and visual modification, Secondary metabolites	Simplot Plant Sciences (USA)	https://www.aphis.usda.gov/biotechnology/downloads/reg_loi/20-168-06_air_inquiry_cbidel.pdf	G37
NGT1	Potato	reduced glycoalkaloid content	Insertion, deletion, substitution in one gene (CBI)	Secondary metabolites	Simplot Plant Sciences (USA)	https://www.aphis.usda.gov/biotechnology/downloads/reg_loi/20-168-02_air_inquiry_cbidel.pdf	G38
NGT1	Potato	Self-incompatibility	Deletion in one gene (CBI)	Reproduction	Simplot Plant Sciences (USA)	https://www.aphis.usda.gov/biotechnology/downloads/reg_loi/20-168-34_air_inquiry_cbidel_a1.pdf	G39
NGT1	Potato	Increased yield, tuber formation	Insertion, deletion, substitution in one gene (CBI)	Yield	Simplot Plant Sciences (USA), Yield10Bioscience (USA)	https://www.aphis.usda.gov/biotechnology/downloads/reg_loi/20-168-03_air_inquiry_cbidel.pdf	G40
NGT1	Potato	Reduced vacuolar invertase, improved storage quality	Insertion, deletion, substitution in one gene (CBI)	Olfactory and visual modification, Storage and transport	Simplot Plant Sciences (USA)	https://www.aphis.usda.gov/biotechnology/downloads/reg_loi/20-168-33_air_inquiry_a1_cbidel.pdf	G41
NGT1	Potato	Non-browning	RNAi; Modification of stuMIR398a to target PPO5 (polyphenol oxidase 5)	Olfactory and visual modification, Storage and transport	Tropic Bioscience (GBR)	https://www.geigs.com/#:~:text=GEiGS%C2%AE%20uses%20universal%20gene,target%20gene%20or%20gene%20family. https://www.aphis.usda.gov/biotechnology/downloads/confirmation-response/21-141-01cr-a2-revised-final-signed.pdf https://www.aphis.usda.gov/biotechnology/downloads/confirmation-response/21-141-01cr-response-signed.pdf	G42
NGT1	Tomato	Increased GABA content (gamma-Aminobutyric acid)	Insertion of 1 bp and with that a stop codon in CaMB-domain of GAD (glutamate decarboxylase)	Secondary metabolites	Sanatech Seed (JAPAN)	https://sanatech-seed.com/en/product-trait-en/ Nonaka et al. 2017: https://www.nature.com/articles/s41598-017-06400-y Testbiotech 2021: https://www.testbiotech.org/gentechnik-grenzen/crispr-Tomaton/basistext https://www.aphis.usda.gov/biotechnology/downloads/reg_loi/20-140-01_air_CBIdel_a2.pdf	G44
NGT1	Tomato	Redued height	Insertion or deletion in SP (self-pruning) and SIER (Erecta) genes	Growth	Zachary Lippman, Cold Spring Harbor Laboratory (USA)	https://www.aphis.usda.gov/biotechnology/downloads/reg_loi/20-149-01_air_inquiry_a1.pdf https://www.aphis.usda.gov/biotechnology/downloads/reg_loi/20-149-01_air_response_signed.pdf	G45
NGT1	Wheat	Increased fiber content	Deletion in one gene (CBI)	Nutrient content	Calyxt Inc. (USA)	https://www.aphis.usda.gov/biotechnology/downloads/reg_loi/17-038-01_air_inquiry_cbidel.pdf https://www.aphis.usda.gov/biotechnology/downloads/reg_loi/17-038-01_air_response_signed.pdf	G46
NGT1	Avocado	Non-browning	Deletions or insertions in PPO (polyphenol oxidase)	Olfactory and visual modification, Storage and transport	J. R. Simplot (USA)	https://www.aphis.usda.gov/biotechnology/downloads/reg_loi/20-168-35_air_inquiry_a2_cbidel.pdf	G51
NGT1	False flax	Increased oil content	Deletions in three homologs of BADC (biotin/lipoyl attachment domain containing)	Nutrient content, Modified content	Yield10 Bioscience (USA), University of Missouri (USA)	https://enveurope.springeropen.com/articles/10.1186/s12302-021-00482-2 https://www.aphis.usda.gov/biotechnology/downloads/reg_loi/20-010-01_air_response_signed.pdf https://www.aphis.usda.gov/biotechnology/downloads/reg_loi/20-010-01_a1_air_inquiry_cbidel.pdf	G55
NGT1	False flax	CBI, maybe increased oil content	Single nucleotide changes (insertion or deletion) Trait C3007	Nutrient content, Modified content	Yield10 Bioscience (USA)	https://www.aphis.usda.gov/biotechnology/downloads/reg_loi/18-142-01_air_inquiry_cbidel.pdf	G56
NGT1	Lettuce	Non-browning	Deletions in two PPO (polyphenol oxidase) genes	Olfactory and visual modification, Storage and transport	Intrexon (USA)	https://www.aphis.usda.gov/biotechnology/downloads/reg_loi/18-243-01_a4_air_cbidel.pdf	G60
NGT1	Alfalfa	Reduced lignin and improved nutrient content	Deletions in one gene (CBI)	Nutrient content	Calyxt Inc. (USA), S&W Seed Company (USA).	https://www.aphis.usda.gov/biotechnology/downloads/reg_loi/17-038-02_air_inquiry_cbidel.pdf	G61
NGT1	Petunia	Flower color	1 bp insertion in one gene (CBI)	Olfactory and visual modification	ToolGen Inc. (Süd- Korea)	https://www.aphis.usda.gov/biotechnology/downloads/reg_loi/19-338-01_air_inquiry_cbidel_a1.pdf	G64
NGT1	Soybean	Altered seed compositions	Deletions in three genes (CBI)	CBI	University of Minnesota (USA)	https://www.aphis.usda.gov/biotechnology/downloads/reg_loi/19-077-02_air_inquiry_cbidel.pdf	G67
NGT1	Soybean	Altered petiole length	Deletion in CNGC20 (cyclic nucleotide gated channel 20) gene	Growth	University of	https://www.aphis.usda.gov/biotechnology/downloads/reg_loi/19-077-01_air_inquiry.pdf	G68
NGT1	Soybean	CBI	Deletions in ten genes (CBI)	CBI	University of Missouri, College of Agriculture, Food and Natural Resources, Division of Plant Science (USA)	https://www.aphis.usda.gov/biotechnology/downloads/reg_loi/20-147-02_air_response_signed.pdf https://www.aphis.usda.gov/biotechnology/downloads/reg_loi/20-147-02_air_a2_inquiry_cbidel.pdf	G72
NGT1	Soybean	Leaf size and seed weight	Deletion in one gene (CBI)	Yield	University of Missouri, College of Agriculture, Food and Natural Resources, Division of Plant Science (USA)	https://www.aphis.usda.gov/biotechnology/downloads/reg_loi/20-147-01_air_response_signed.pdf	G73
NGT1	Soybean	Drought and salt tolerance	Deletion in GmDrb2a and GmDrb2b (Double-stranded RNA-binding 2) gene	Drought tolerance	USDA-ARS, Plant Science Research Unit (USA)	https://doi.org/10.1111%2Fpbi.12857 https://doi.org/10.1021/acs.jproteome.5b00616 https://www.aphis.usda.gov/biotechnology/downloads/reg_loi/17-219-01_air_inquiry.pdf https://www.aphis.usda.gov/biotechnology/downloads/reg_loi/17-219-01_air_response_signed.pdf	G74
NGT1	Soybean	Herbicide resistance	1 bp mutation in PPO (protoporphyrinogen oxidase) gene	Herbicide resistance gene modification	Bioheuris (ARG), Santa Rosa Semillas (ARG), Grupo Don Mario (ARG), ACA (ARG)78	https://www.aphis.usda.gov/biotechnology/downloads/confirmation-response/22-269-01cr-request.pdf	G75
NGT1	Rice	Bacteria blight resistance	Insertion or deletion in promoter region of SWEET11, SWEET13 or SWEET14	Bacteria resistance	University of Missouri, College of Agriculture, Food and Natural Resources, Division of Plant Science (USA)	https://www.aphis.usda.gov/biotechnology/downloads/reg_loi/20-143-01_air_inquiry_a1.pdf https://www.aphis.usda.gov/biotechnology/downloads/reg_loi/20-143-01_air_response_signed.pdf https://www.nature.com/articles/s41587-019-0267-z	G80
NGT1	Rice	Increased yield	Insertion or deletion in genes PYL1 - PYL6 and PYL12 (pyrabactin resistance 1-like)	Yield	Purdue University (USA), Chinese Academy of Sciences (China)	https://www.ncbi.nlm.nih.gov/pmc/articles/PMC6003368/	G81
NGT1	Wheat	redued acrylamide content	Insertion, deletion or substitution in ASN2 (asparagine synthetase) gene	Secondary metabolites	Rothamsted Research (GBR)	https://www.rothamsted.ac.uk/news/genome-edited-wheat-reduce-cancer-risk-bread-and-toast https://onlinelibrary.wiley.com/doi/full/10.1111/pbi.13573?af=R	G82
NGT1	Barley	Naked caryopsis	Deletion in NUD (nudum Lokus; Apetala 2/Ethylene-Response Factor) gene	Modified content	Sainsbury Laboratory (GB), Oregon State University (USA)	https://www.aphis.usda.gov/biotechnology/downloads/reg_loi/20-113-01_air_response_signed.pdf https://www.aphis.usda.gov/biotechnology/downloads/reg_loi/20-113-01_air_inquiry.pdf	G90
NGT1	Maize	Non-public	1 bp insertion or 50 bp deletion in one gene (CBI)	CBI	Iowa State University (USA)	https://www.aphis.usda.gov/biotechnology/downloads/reg_loi/18-110-01_air_inquiry_cbidel_a2.pdf https://www.aphis.usda.gov/biotechnology/downloads/reg_loi/18-110-01_air_response_signed.pdf	G102
NGT1	Potato	Late blight (fungi) resistance	Insertion or deletion in StDND1, StCHL1 or StDMR6-1	Fungi resistance	Swedish University of Agricultural Sciences SLU, Department of Plant Protection Biology (SWE)	https://www.nature.com/articles/s41598-021-83972-w	G103
NGT1	Tomato	Improved harvest, fruits without pedicel abscission zone	Insertion or deletion in J2 (Jointless 2) gene	Harvest	University of Florida, Horticultural Sciences (USA)	https://www.aphis.usda.gov/biotechnology/downloads/reg_loi/19-282-01-air-response-signed.pdf https://www.aphis.usda.gov/biotechnology/downloads/reg_loi/19-282-01-a3-air-inquiry-cbidel.pdf,	G110
NGT1	Tomato	Altered levels of acylsugar metabolites	Deletions or substitutions in SpASAT2, SpASFF1, SiASAT1 or SIASAT4 (acylsucrose acyltransferases) genes	Biotic stress tolerance: unspecific	University of Michigan (USA)	https://www.aphis.usda.gov/biotechnology/downloads/reg_loi/19-143-01_air_inquiry_a1.pdf https://www.aphis.usda.gov/biotechnology/downloads/reg_loi/19-143-01_air_response_signed.pdf	G112
NGT1	Alfalfa	Herbicide resistance	1 bp substitution in ALS1 (Acetolactate Synthase) gene	Herbicide resistance gene modification	Bioheuris (ARG)	https://www.aphis.usda.gov/biotechnology/downloads/confirmation-response/22-151-01cr-cbidel-a3-request.pdf https://www.aphis.usda.gov/biotechnology/downloads/confirmation-response/22-151-01cr-response-signed.pdf	G114
NGT1	Cotton	Herbicide resistance	1 bp substitution in PPO2 (protoporphyrinogen oxidase 2) gene	Herbicide resistance gene modification	Bioheuris (ARG), Gensus (ARG)	https://www.aphis.usda.gov/biotechnology/downloads/confirmation-response/22-269-02cr-request.pdf https://www.aphis.usda.gov/biotechnology/downloads/confirmation-response/22-269-02cr-response-signed.pdf	G115
NGT1	Sorghum	Herbicide resistance	1 bp substitution in ALS (Acetolactate Synthase) gene	Herbicide resistance gene modification	Bioheuris (ARG), Tobin (ARG)	https://www.aphis.usda.gov/biotechnology/downloads/confirmation-response/22-201-01cr-request.pdf https://www.aphis.usda.gov/biotechnology/downloads/confirmation-response/22-201-01cr-response-signed.pdf https://www.aphis.usda.gov/biotechnology/downloads/confirmation-response/22-329-01cr-request.pdf https://www.aphis.usda.gov/biotechnology/downloads/confirmation-response/22-329-01cr-response-signed…	G118
NGT1	Tapioca	Virus resistance	1 bp substitution in MePOLD1 (DNA polymerase δ subunit 1) gene	Virus resistance	Corteva (USA), Donald Danforth Plant Science Center (USA), Virus Resistant Cassava for Africa (VIRCA)	DOI 10.1038/s41467-022-31414-0 https://www.danforthcenter.org/news/new-research-reveals-mutation-responsible-for-disease-resistance-in-cassava/	G120
NGT1	Banana	Improved storage quality	Insertion, deletion or substitution in PPO (polyphenol oxidase) gene	Olfactory and visual modification, storage and transport	Tropic Bioscience (GBR)	https://www.aphis.usda.gov/biotechnology/downloads/confirmation-response/21-356-01cr-cbidel-a4.pdf https://www.aphis.usda.gov/biotechnology/downloads/confirmation-response/21-356-01cr-response-signed.pdf	G124
NGT1	Cabbage	Regulation of sulfur metabolism	Insertions or deletions in MYB28	Nutrient content	John Innes Center (GBR)	https://pubmed.ncbi.nlm.nih.gov/34152214/	G127
NGT1	Tobacco	Reduced nectarin (superoxide dismutase) proteins in floral nectar	Insertions in NEC3a gene or in NEC1b and NEC1d genes	CBI	Max-Planck-Institut für chemische Ökologie, Jena (DEU)	https://www.aphis.usda.gov/biotechnology/downloads/reg_loi/18-248-01_air_response_signed.pdf	G129
NGT1	Tobacco	Lipid metabolism, diverse traits	Insertions, deletions or substitutions in the NgCER1-like, NgCER3-like, NgKCS6-like, NgFAR3-like or NgABCG32-like genes	Drought tolerance, Biotic stress tolerance: unspecific	Weizmann Institute of Science (ISR), Max Planck Institute for Chemical Ecology, Utah (USA)	https://www.aphis.usda.gov/biotechnology/downloads/reg_loi/20-044-01_air_inquiry_a1.pdf https://www.aphis.usda.gov/biotechnology/downloads/reg_loi/20-044-01_air_response_signed.pdf https://nph.onlinelibrary.wiley.com/doi/10.1111/nph.18615	G132
NGT1	Orange	Citrus canker resistance	Deletions in LOB1 (lateral organ boundaries) gene	Bacteria resistance	Soil Culture Solutions, LLC (Soilcea) (USA)	https://www.aphis.usda.gov/biotechnology/downloads/reg_loi/19-260-01_air_inquiry_cbidel.pdf https://www.aphis.usda.gov/biotechnology/downloads/reg_loi/19-260-01_air_response_signed.pdf	G134
NGT1	Physalis	Diverse traits (e.g. fruit size)	Insertions or deletions in CLV1 (Clavata), SP (Self-pruning) or SP5G (self-pruning 5G) genes	Yield, Growth	Physalis Improvement Project, Boyce Thompson Institute (USA)	https://innovativegenomics.org/wp-content/uploads/2018/11/Lemmon-2018.pdf	G142
NGT1	Raspberry	Diverse traits (cherries, blackberries without stones)	Point mutation in one gene (CBI)	CBI	Pairwise Plants (USA)	https://www.aphis.usda.gov/biotechnology/downloads/confirmation-response/23-072-01cr-request.pdf / https://www.aphis.usda.gov/biotechnology/downloads/confirmation-response/23-072-02cr-request.pdf / https://www.aphis.usda.gov/biotechnology/downloads/confirmation-response/23-072-03cr-request.pdf / https://www.aphis.usda.gov/biotechnology/downloads/confirmation-response/23-072-04cr-request.pdf / htt…	G144
NGT1	Herbs	Altered seed compositions (oil content)	Point mutations or deletion in three genes (CBI)	Modified content	CoverCress Inc. (USA)	https://www.aphis.usda.gov/biotechnology/downloads/reg_loi/19-218-01_air_inquiry_cbidel.pdf https://www.aphis.usda.gov/biotechnology/downloads/reg_loi/19-218-01_air_supporting_data_cbidel.pdf https://www.aphis.usda.gov/biotechnology/downloads/reg_loi/19-218-01_air_response_signed.pdf	G147
NGT1	Rapeseed	Herbicide resistance (ALS/AHAS)	Point mutation in AHAS1 and AHAS3 (acetohydroxy acid synthase) genes	Herbicide resistance gene modification	Cibus (USA)	https://euginius.eu/euginius/pages/gmo_detail.jsf?gmoname=5715 https://inspection.canada.ca/plant-varieties/plants-with-novel-traits/approved-under-review/decision-documents/dd-2013-100/eng/1427383332253/1427383674669	G1
NGT1	Rapeseed	Herbicide resistance (ALS/AHAS)	Point mutation ("PM2") in AHAS1 and AHAS3 (Acetohydroxy acid synthase) genes	Herbicide resistance gene modification	Cibus (USA)	https://patents.justia.com/patent/20230141977,	G2
NGT1	Rapeseed	Shatter-tolerance	CBI	CBI	Cibus (USA), Farmers Business Network (FBN) (CAN)	https://patents.justia.com/patent/20230141977 https://patents.justia.com/patent/20230057587 https://www.aphis.usda.gov/biotechnology/downloads/reg_loi/20-160-01_air_inquiry_a1_cbidel.pdf	G3
NGT1	Soybean	Altered fatty acid composition	Non-public	Nutrient content, Bioenergy, Modified content	Calyxt Inc. (USA)	https://www.annualreviews.org/doi/10.1146/annurev-ento-120709-144755	G12
NGT1	Soybean	Altered seed compositions, altered flavour	Deletion in one gene (CBI)	Olfactory and visual modification	Minnesota (USA)	https://www.aphis.usda.gov/biotechnology/downloads/confirmation-response/22-207-04cr-request.pdf	G69
inferred NGT1	Rapeseed	Altered fatty acid composition and oil content	Deletion in BADC (regulator of acetyl-CoA carboxylase) (CBI)	Modified content	Yield10Bioscience (USA)	https://www.aphis.usda.gov/biotechnology/downloads/reg_loi/20-168-04_air_inquiry_a1_cbidel.pdf https://www.aphis.usda.gov/biotechnology/downloads/reg_loi/20-163-02_air_response_signed.pdf	G7
inferred NGT1	Soybean	Drought tolerance and nematode resistance	Overexpression of Glb1-1 (non-symbiotic globin class 1) and AREB1 (ABA-responsive element binding protein 1) via promotor mutation (CBI)	Drought tolerance, Nematode resistance	Corteva (USA), Agricultural Research Corporation (EMBRAPA) (BRA)	doi: 10.1038/s41598-019-44571-y; https://www.alice.cnptia.embrapa.br/alice/bitstream/doc/1151081/1/Basso-et-al.-2022-GmGlb1.pdf soybean embrapa 10.1007/s00299-022-02941-3	G15
inferred NGT1	Soybean	CBI	Deletion or Insertion (CBI)	CBI	Inari Agriculture Inc. (USA)	https://www.aphis.usda.gov/biotechnology/downloads/reg_loi/20-168-31_air_inquiry_a1_cbidel.pdf https://www.aphis.usda.gov/biotechnology/downloads/reg_loi/20-168-31_air_response_signed.pdf	G22
inferred NGT1	Maize	CBI	Deletion or Insertion (CBI)	CBI	Inari Agriculture Inc. (USA)	https://www.aphis.usda.gov/biotechnology/downloads/reg_loi/20-168-30_air_inquiry_cbidel.pdf https://www.aphis.usda.gov/biotechnology/downloads/reg_loi/20-168-30_air_response_signed.pdf	G23
inferred NGT1	Avocado	CBI, unclear if "non-browning"	Insertion, deletion or substitution of one PPO (polyphenol oxidase) gene with CRISPR (CBI)	Olfactory and visual modification, Storage and transport	GreenVenus (USA)	https://www.prnewswire.com/news-releases/ag-biotech-innovator-greenvenus-achieves-breakthrough-in-non-browning-avocado-through-gene-editing-301842939.html https://www.aphis.usda.gov/biotechnology/downloads/reg_loi/20-163-01_air_inquiry_a1_cbidel.pdf https://www.aphis.usda.gov/biotechnology/downloads/reg_loi/20-163-01_air_response_signed.pdf	G50
inferred NGT1	Strawberry	Higher yield by 2x fruit formation/flowering	Insertions, deletions or substiutions in one gene (CBI)	Reproduction, Yield	J. R. Simplot (USA), ev. mit Plant Sciences Inc. (PSI) (USA)	https://www.aphis.usda.gov/biotechnology/downloads/reg_loi/20-168-05_air_inquiry_a1_cbidel.pdf	G52
inferred NGT1	Mustard	CBI, enhanced taste	Knockout of two genes (CBI) with CRISPR	Olfactory and visual modification	Pairwise (USA)	https://www.mdpi.com/2223-7747/11/19/2494/htm https://www.aphis.usda.gov/biotechnology/downloads/reg_loi/20-168-07_air_inquiry_a3_a2_cbidel.pdf https://www.aphis.usda.gov/biotechnology/downloads/reg_loi/20-168-07_air_response_signed.pdf	G54
inferred NGT1	False flax	CBI, unclear if higher oil content	Modification with CRISPR (CBI)	Nutrient content, Modified content	Rothamsted Research, (GBR), Yield10Bioscience	https://enveurope.springeropen.com/articles/10.1186/s12302-021-00482-2	G58
inferred NGT1	Wheat	Fungi resistance	Mutation of the CPL3 gene (CBI)	Fungi resistance	Träger: Gemeinschaft zur Förderung von Pflanzen- innovation e. V. (GFPi)	https://www.dottenfelderhof.de/fileadmin/images/forschung/Veroeffentlichungen/Zuechtung/PILTON_-_das_neue_Wheatwunder_BS_12_2020_S_18.pdf	G88
inferred NGT1	Maize	Virus resistance against Maize lethal necrosis disease	Small modification in one gene (CBI)	Virus resistance	Corteva (USA), CIMMYT (MEX)	https://www.cimmyt.org/content/uploads/2020/02/MLN-gene-editing-FAQS-2019-11.pdf https://repository.cimmyt.org/bitstream/handle/10883/21893/64898.pdf?sequence=1&isAllowed=y https://www.cimmyt.org/projects/mln-gene-editing-project/	G97
inferred NGT1	Maize	Fungi resistance against black leaf spot disease	Insertion of PH4GP-Ht1 gene (CBI)	Fungi resistance	Corteva (USA)	https://pubmed.ncbi.nlm.nih.gov/36180934/ Patente: WO2017066597A1, WO2018071362A1	G98
inferred NGT1	Maize	Drougth tolerance	Insertion or deletion in one gene (CBI)	Drought tolerance	Vlaams Instituut voor Biotechnologie (VIB) (BEL)	https://webgate.ec.europa.eu/fip/GMO_Registers/GMO_Summary.php?NotificationNum=B/BE/22/V3&Cat=gmp	G101
inferred NGT1	Potato	Reduced enzymatic browning reaction "non-browning"	Insertion or deletion in the PPO2 (polyphenol oxidase) gene (CBI)	Olfactory and visual modification, Lager und Transport	u.a Consejo Nacional de Investigaciones Científicas y Técnicas/CONICE T, Buenos Aires (ARG), Department of Plant Breeding, Swedish University of Agricultural Sciences, Alnarp (SWE)	https://www.frontiersin.org/articles/10.3389/fpls.2019.01649/full?utm_source=F-NTF&utm_medium=EMLX&utm_campaign=PRD_FEOPS_20170000_ARTICLE	G105
inferred NGT1	Pea	Altered content (altered taste)	Insertions or deletions in one gene (CBI)	Olfactory and visual modification	Benson Hill (USA)	https://www.aphis.usda.gov/biotechnology/downloads/reg_loi/20-108-01-air-a1-cbidel.pdf https://www.aphis.usda.gov/biotechnology/downloads/reg_loi/20-108-01-air-response-signed.pdf	G109
inferred NGT1	Tobacco	CBI	Insertions and/or deletions in 12 genes (CBI)	CBI	Altria Client Services (USA).	https://www.aphis.usda.gov/biotechnology/downloads/reg_loi/19-101-01_air_inquiry_a1_cbidel.pdf https://www.aphis.usda.gov/biotechnology/downloads/reg_loi/19-101-01_air_response_signed.pdf	G130
inferred NGT1	Tobacco	Biomass	Insertions or deletions in 8 Nitab4.5 genes (CBI)	Yield	Agencia Estatal Consejo Superior de Investigaciones Cientificas, Instituto de Biologia Molecular y Celular de Plantas (ESP)	https://webgate.ec.europa.eu/fip/GMO_Registers/GMO_Summary.php?NotificationNum=B/ES/20/01&Cat=gmp	G131
inferred NGT1	Tobacco	Diverse Traits (no flower formation, reduced in alkaloids)	Insertions or deletions in genes of the SPL family (SQUAMOSA promoter binding protein like) and/or FT5 Gene (flowering locus T) or MPO1 Genes (N-methylputrescin oxidase 1) or BBL (Berberine Bridge Enzyme-like)	Growth, Secondary metabolites	Instituto de Biología Molecular y Celular de Plantas, Agencia Estatal Consejo Superior de Investigaciones Científicas (ESP)	https://webgate.ec.europa.eu/fip/GMO_Registers/GMO_Summary.php?NotificationNum=B/ES/21/01&Cat=gmp	G133
inferred NGT1	Orange	Bacteria resistance against citrus canker	Modification of one gene (CBI)	Bacteria resistance	2Blades Foundation (USA)	https://2blades.org/projects-and-technology/projects/citrus-canker/	G135
inferred NGT1	Strawberry	Yield, Storage, increased sugar content, diseases resistance	Insertion, deletion or substitution in one gene (CBI)	Yield	J. R. Simplot (USA)	https://www.aphis.usda.gov/biotechnology/downloads/reg_loi/20-168-05_air_inquiry_a1_cbidel.pdf	G145
inferred NGT1	Herbs	(Oil) content in seeds	Mutation in one gene (CBI)	Modified content	Illinois State University, Department of Biological Sciences (USA)	https://www.aphis.usda.gov/biotechnology/downloads/reg_loi/19-189-01_air_inquiry_cbidel.pdf https://www.aphis.usda.gov/biotechnology/downloads/reg_loi/19-189-01_air_supporting_data_cbidel.pdf https://www.aphis.usda.gov/biotechnology/downloads/reg_loi/19-189-01_air_response_signed.pdf	G146
NGT2	Rice	Salt tolerance	Intragenesis, rice actin promotor in front of DREB1A	Salt tolerance	Texas A&M University (USA), Nexgen Plants Pty Ltd (AUS)	https://www.aphis.usda.gov/biotechnology/downloads/reg_loi/17-286-01_01_air_inquiry.pdf https://www.aphis.usda.gov/biotechnology/downloads/reg_loi/17-286-01_air_response_signed.pd	G35
inferred NGT2	Wheat	Reduced gluten content	Multiplexing (CBI)	Nutrient content	Arcadia Bioscience (USA)	https://patents.google.com/patent/US10750690B2/fr	G48
inferred NGT2	Wheat	Glutenfree wheat	Insertion and/ or deletion in the α-gliadin genes	Nutrient content	Institute for Sustainable Agriculture in Cordoba (ESP)	https://onlinelibrary.wiley.com/doi/full/10.1111/pbi.12837	G87
inferred NGT2	Wheat	Glutenfree wheat (durum wheat)	Insertion and/ or deletion in the α-gliadin genes	Nutrient content	Institute for Sustainable Agriculture in Cordoba (ES)	https://onlinelibrary.wiley.com/doi/full/10.1111/pbi.12837	G89
inferred NGT2	Watermelon	Altered sugar metabolism (synthesis of a new sweetner)	Modulation of a mogroside (sweetener) metabolism (CBI)	Modified content	Elo Life Sciences (USA)	https://patents.google.com/patent/WO2021202513A1/en	G113
Not categorizable	Rapeseed	Fungi resistance agains sclerotinia	CBI	CBI	Cibus (USA)	-	G4
Not categorizable	Rapeseed	Efficient nitrogen use	Non-public	CBI	Cibus (USA)	-	G5
Not categorizable	Soybean	Herbicide resistance	Non-public	Non-public	Cibus (USA)	-	G8
Not categorizable	Soybean	Enhanced protein content and taste	Non-public	Non-public	Calyxt Inc. (USA)	-	G13
Not categorizable	Soybean	Increased oil content	Non-public	Non-public	Corteva (USA)	https://journals.plos.org/plosone/article?id=10.1371/journal.pone.0145660 Ragsdale, 2011: https://www.annualreviews.org/doi/10.1146/annurev-ento-120709-144755	G16
Not categorizable	Soybean	Increased protein content	Non-public	Nutrient content	Amfora (USA),Corteva (USA)	https://soybeanresearchinfo.com/research-highlight/gene-editing-to-increase-soy-protein-content/	G17
Not categorizable	Soybean	Non-public	Non-public	Non-public	DonMario Semillas (ARG, BRA)	-	G19
Not categorizable	Maize	Fungi resistance	Non-public	Fungi resistance	Evogene (ISR), Bayer Crop Science (DEU)	-	G28
Not categorizable	Maize	Diverse traits, Non-public	Non-public	Non-public	Cibus (USA)	-	G29
Not categorizable	Rice	Herbicide resistance, CBI	CBI	Herbicide resistance	Cibus (USA)	https://www.aphis.usda.gov/biotechnology/downloads/reg_loi/20-167-01_air_inquiry_cbidel.pdf	G31
Not categorizable	Rice	Herbicide resistance, CBI	CBI	Herbicide resistance	Cibus (USA)	https://www.aphis.usda.gov/biotechnology/downloads/reg_loi/18-348-01-air-response-signed.pdf	G32
Not categorizable	Rice	Disease resitance, Non-public	Non-public	Biotic stress tolerance: unspecific	Cibus (USA)	-	G33
Not categorizable	Rice	Efficient nitrogen use	Non-public	Nitrogen use efficiency	Cibus (USA)	-	G34
Not categorizable	Tomato	CBI	Deletion, Insertion with CRIPSR (CBI)	CBI	Inari Agriculture Inc. (USA)	https://www.aphis.usda.gov/biotechnology/downloads/reg_loi/20-168-32_air_inquiry_cbidel.pdf https://www.aphis.usda.gov/biotechnology/downloads/reg_loi/20-168-32_air_response_signed.pdf	G43
Not categorizable	Wheat	Diverse traits, Non-public	Non-public	Diverse traits	Cibus (USA)	-	G47
Not categorizable	Oat	Cold tolerance	Non-public	Cold tolerance	Calyxt Inc. (USA)	-	G49
Not categorizable	Strawberry	Enhanced shelf life	Non-public	Storage and transport	J. R. Simplot (USA), Plant Sciences Inc. (PSI) (USA)	-	G53
Not categorizable	Hemp	Increased yield	Non-public	Yield	Calyxt Inc. (USA), Partnerschaft mit NRGene Ltd. (ISR)	-	G62
Not categorizable	Hemp	Reduced THC content, diverse traits	Non-public	Diverse traits	Calyxt Inc. (USA),Partnerschaft mit NRGene Ltd. (ISR)	-	G63
Not categorizable	Rapeseed	Diverse traits, Non-public	Non-public	Diverse traits	Corteva (USA)	-	G65
Not categorizable	Rapeseed	Reduced content of saturated fatty acids	Non-public	Nutrient content	Cargill (USA), Neu: Elo Life Systems (USA)	https://precisionbiosciences.com/arcus-genome-editing/ https://www.cargill.com/2018/cargill-precision-biosciences-team-up	G66
Not categorizable	Soybean	Diverse traits	Non-public	Diverse traits	Yield10 Bioscience (USA), GDM (USA)	-	G71
Not categorizable	Rice	Non-public	Non-public	Non-public	Benson Hill Biosystems (USA), Rice Tec (USA)79	-	G76
Not categorizable	Rice	Increased protein content	Non-public	Nutrient content	Amfora (USA)	-	G77
Not categorizable	Rice	Disease resistance,Yield/Yield stability & drought tolerance	Non-public	Diverse traits	Corteva (USA)	-	G78
Not categorizable	Rice	Yield, increased resilience agains biotic and abiotic stress	Non-public	Diverse traits	Corteva (USA), International Rice Institute (IRRI) (PHL)	-	G79
Not categorizable	Wheat	Increased protein content	Non-public	Modified content	Amfora (USA)		G83
Not categorizable	Wheat	Yield	Non-public	Reproduction	Napigen (USA)	https://peerj.com/articles/8362/ https://portal.nifa.usda.gov/web/crisprojectpages/1023173-development-of-mitochondrial-transformation-in-plants-toward-creating-elite-hybrid-wheat.html	G84
Not categorizable	Wheat	Disease resistance,Yield/Yield stability	Non-public	Biotic stress tolerance: unspecific, Yield	Corteva (USA)	-	G85
Not categorizable	Wheat	HybridWheat, Non-public	Non-public	Non-public	Corteva (USA)	-	G86
Not categorizable	False flax	Herbicide resistance	Non-public	Herbicide resistance, gene modification	Yield10Bioscience (USA)	-	G91
Not categorizable	False flax	Fungi resistance against mildew	Non-public	Fungi resistance	Yield10Bio-science (USA)	-	G92
Not categorizable	Maize	Increased ethanol content	Non-public	Bioenergy	Benson Hill Biosystems (USA), Brownseed hybrids (USA)	-	G94
Not categorizable	Maize	Diverse traits	Non-public	Diverse traits	Yield10 Bioscience (USA)	-	G95
Not categorizable	Diverse	Diverse traits	Non-public	Diverse traits	Pairwise Plants (USA), Bayer Crop Science (DEU)	-	G96
Not categorizable	Potato	Resistance against pathogens	Non-public	Biotic stress tolerance: unspecific	Verbundprojekt ADLATUS (gefördert vom BMEL)	https://www.bmel.de/SharedDocs/Pressemitteilungen/DE/2020/236-widerstandsfaehige-kulturpflanzen.html	G104
Not categorizable	Tomato	Non-public	Non-public	Non-public	UC Davis Plant Biology Department (USA), TechAccel (USA)		G111
Not categorizable	Sorghum	Diverse Traits, (resistence, quality and content, resilience)	Non-public	Diverse traits	Corteva (USA), Donald Danforth Plant Science Center (USA)	-	G116
Not categorizable	Sorghum	Yield	Non-public	Diverse traits	Corteva (USA), International Crops Research Institute for the Semi-Arid Tropics (ICRISAT) (IND)	-	G117
Not categorizable	Sunflower	Fungi resistance, diverse traits	Non-public	Biotic stress tolerance: unspecific	Corteva (USA)	-	G121
Not categorizable	Banana	Fungi resistance	Non-public	Fungi resistance	Elo Life Sciences (USA), Dole (USA)	-	G122
Not categorizable	Banana	Fungi resistance against 'Panama disease'	Non-public	Fungi resistance	Tropic Bioscience (GBR)	-	G123
Not categorizable	Coffee	Content, coffeein free	Non-public	Secondary metabolites	Tropic Bioscience (GBR)	-	G125
Not categorizable	Chickpea	Protein content as meat substitution product	Non-public	Nutrient content	Elo Life Sciences (AUS), Queensland University of Technology (AUS)	-	G126
Not categorizable	Hemp	Diverse traits (e.g. oil content)	Non-public	Diverse traits	California Hemp Corporation (USA), Benson Hill Biosystems (USA), University of California, Davis (UC Davis) (USA)		G128
Not categorizable	Apple	Bacteria resitance against fire blight	Non-public	Bacteria resistance	Okanagan Speciality Fruits (USA)	-	G139
Not categorizable	Apple	Fungi resistence against scab	Non-public	Fungi resistance	Okanagan Speciality Fruits (USA)	-	G140
Not categorizable	Peach	Virus resistance against plum pox virus	Non-public	Virus resistance	Okanagan Speciality Fruits (USA)	-	G141

## Sheet: TableS2 APHIS (2011-2023)
		New genomic techniques (NGT)
	Yes	No	Not categorizable
total amount	134	68	6
			Category (NGTs)
	NGT1	inferred NGT1	NGT2	inferred NGT2	Transgenic	Not categorizable
total amount	75	42	0	0	3	14
total amount [%]	55.9701	31.3433	0	0	2.23881	10.4478
OKAYor NGT2 [%]	100		0
Category	Plant	Moleculare characterization	Producer	Request to APHIS	Date	APHIS Reference	NGT( YES /NO)	Case number
inferred NGT1	Maize	Single genetic modification of one CBI gene	Inari Agriculture, Inc.	Confirmation request submitted to APHIS	2023-08-31	https://www.aphis.usda.gov/biotechnology/downloads/confirmation-response/23-209-02cr-request.pdf https://www.aphis.usda.gov/biotechnology/downloads/confirmation-response/23-209-02cr-signed-response.pdf	YES	1
NGT1	Pennycress	Single genetic modification (e.g. 1 bp insertion) of one CBI gene	CoverCress Inc.	Confirmation request submitted to APHIS	2023-08-31	https://www.aphis.usda.gov/biotechnology/downloads/confirmation-response/23-208-01cr-request.pdf https://www.aphis.usda.gov/biotechnology/downloads/confirmation-response/23-208-01cr-signed-response.pdf	YES	2
NGT1	Pennycress	Single genetic modification (e.g. 1 bp substitution) of one CBI gene	CoverCress Inc.	Confirmation request submitted to APHIS	2023-08-31	https://www.aphis.usda.gov/biotechnology/downloads/confirmation-response/23-174-01cr-request.pdf https://www.aphis.usda.gov/biotechnology/downloads/confirmation-response/23-174-01cr-signed-response.pdf	YES	3
inferred NGT1	Tomato	Single genetic modification of one CBI gene	Redi Plants Corporation	Confirmation request submitted to APHIS	2023-08-08	https://www.aphis.usda.gov/biotechnology/downloads/confirmation-response/23-114-01cr-request.pdf https://www.aphis.usda.gov/biotechnology/downloads/confirmation-response/23-114-01cr-signed-response.pdf	YES	4
NGT1	Pennycress	single genetic modification (e.g. 2bp deletion) of one CBI gene	CoverCress Inc.	Confirmation request submitted to APHIS	2023-06-28	https://www.aphis.usda.gov/biotechnology/downloads/confirmation-response/23-142-01cr-request.pdfhttps://www.aphis.usda.gov/biotechnology/downloads/confirmation-response/23-142-01cr-signed-response.pdf	YES	5
NGT1	Pennycress	single genetic modification (e.g. single bp insertion) of one CBI gene	CoverCress Inc.	Confirmation request submitted to APHIS	2023-06-28	https://www.aphis.usda.gov/biotechnology/downloads/confirmation-response/23-142-02cr-request.pdf https://www.aphis.usda.gov/biotechnology/downloads/confirmation-response/23-142-02cr-signed-response.pdf	YES	6
inferred NGT1	Blackberry	single genetic modification of one CBI gene (WRKY transcription factor)	Pairwise Plant Services, Inc.	Confirmation request submitted to APHIS	2023-06-01	https://www.aphis.usda.gov/biotechnology/downloads/confirmation-response/23-072-08cr-request.pdf https://www.aphis.usda.gov/biotechnology/downloads/confirmation-response/23-072-08cr-signed-response.pdf	YES	7
inferred NGT1	Blackberry	single genetic modification of one CBI gene (MADS-box transcription factor)	Pairwise Plant Services, Inc.	Confirmation request submitted to APHIS	2023-06-01	https://www.aphis.usda.gov/biotechnology/downloads/confirmation-response/23-072-07cr-request.pdf https://www.aphis.usda.gov/biotechnology/downloads/confirmation-response/23-072-07cr-signed-response.pdf	YES	8
inferred NGT1	Blackberry	single genetic modification of one CBI gene (MADS-box transcription factor)	Pairwise Plant Services, Inc.	Confirmation request submitted to APHIS	2023-06-01	https://www.aphis.usda.gov/biotechnology/downloads/confirmation-response/23-072-06cr-request.pdf https://www.aphis.usda.gov/biotechnology/downloads/confirmation-response/23-072-06cr-signed-response.pdf	YES	9
inferred NGT1	Blackberry	single genetic modification of one CBI gene (member of NAC domain transcrption family)	Pairwise Plant Services, Inc.	Confirmation request submitted to APHIS	2023-06-01	https://www.aphis.usda.gov/biotechnology/downloads/confirmation-response/23-072-05cr-request.pdf https://www.aphis.usda.gov/biotechnology/downloads/confirmation-response/23-072-05cr-signed-response.pdf	YES	10
inferred NGT1	Blackberry	single genetic modification of one CBI gene (member of NAC domain transcrption family)	Pairwise Plant Services, Inc.	Confirmation request submitted to APHIS	2023-06-01	https://www.aphis.usda.gov/biotechnology/downloads/confirmation-response/23-072-04cr-request.pdf https://www.aphis.usda.gov/biotechnology/downloads/confirmation-response/23-072-04cr-signed-response.pdf	YES	11
inferred NGT1	Blackberry	single genetic modification of one CBI gene (transcription factor of a subgroup of MYB genes)	Pairwise Plant Services, Inc.	Confirmation request submitted to APHIS	2023-06-01	https://www.aphis.usda.gov/biotechnology/downloads/confirmation-response/23-072-03cr-request.pdf https://www.aphis.usda.gov/biotechnology/downloads/confirmation-response/23-072-03cr-signed-response.pdf	YES	12
inferred NGT1	Blackberry	single genetic modification of one CBI gene (plastid transporter primary function as chloroplast envelope protein)	Pairwise Plant Services, Inc.	Confirmation request submitted to APHIS	2023-06-01	https://www.aphis.usda.gov/biotechnology/downloads/confirmation-response/23-072-02cr-request.pdf https://www.aphis.usda.gov/biotechnology/downloads/confirmation-response/23-072-02cr-signed-response.pdf	YES	13
inferred NGT1	Blackberry	single genetic modification of one CBI gene (MYB transcription factor)	Pairwise Plant Services, Inc.	Confirmation request submitted to APHIS	2023-06-01	https://www.aphis.usda.gov/biotechnology/downloads/confirmation-response/23-072-01cr-request.pdf https://www.aphis.usda.gov/biotechnology/downloads/confirmation-response/23-072-01cr-signed-response.pdf	YES	14
NGT1	Pennycress	single genetic modification (e.g. 1 bp insertion) of one CBI gene	CoverCress Inc.	Confirmation request submitted to APHIS	2023-05-31	https://www.aphis.usda.gov/biotechnology/downloads/confirmation-response/23-107-02cr-request.pdf https://www.aphis.usda.gov/biotechnology/downloads/confirmation-response/23-107-02cr-signed-response.pdf	YES	15
NGT1	Pennycress	single genetic modification (e.g. 2 bp deletion) of one CBI gene	CoverCress Inc.	Confirmation request submitted to APHIS	2023-05-31	https://www.aphis.usda.gov/biotechnology/downloads/confirmation-response/23-107-01cr-request.pdf https://www.aphis.usda.gov/biotechnology/downloads/confirmation-response/23-107-01cr-signed-response.pdf	YES	16
NGT1	Potato	genetic modification (single bp deletion) of one CBI gene (PPO family gene)	Phytoform Labs Ltd.	Confirmation request submitted to APHIS	2023-05-02	https://www.aphis.usda.gov/biotechnology/downloads/confirmation-response/23-060-01cr-request.pdf https://www.aphis.usda.gov/biotechnology/downloads/confirmation-response/23-060-01cr-signed-response.pdf	YES	17
NGT1	Sorghum	single bp substitution (ALS gene)	Bioheuris Inc	Confirmation request submitted to APHIS	2023-04-28	https://www.aphis.usda.gov/biotechnology/downloads/confirmation-response/22-329-01cr-request.pdf https://www.aphis.usda.gov/biotechnology/downloads/confirmation-response/22-329-01cr-response-signed.pdf	YES	18
Transgenic	Apple	Insertion of transgene (including agrobacterium flanking sites and antibiotica resistance gene)	Okanagan Specialty Fruits Inc.	Confirmation request submitted to APHIS	2023-04-20	https://www.aphis.usda.gov/biotechnology/downloads/confirmation-response/23-054-01cr-request.pdf https://www.aphis.usda.gov/biotechnology/downloads/confirmation-response/23-054-01cr-response-signed.pdf	NO	19
NGT1	Soybean	single deletion in one CBI gene	Benson Hill, Inc.	Confirmation request submitted to APHIS	2023-04-19	https://www.aphis.usda.gov/biotechnology/downloads/confirmation-response/23-033-01cr-request.pdf https://www.aphis.usda.gov/biotechnology/downloads/confirmation-response/23-033-01cr-response-signed.pdf	YES	20
NGT1	Soybean	single deletion in one CBI gene	Benson Hill, Inc.	Confirmation request submitted to APHIS	2023-04-19	https://www.aphis.usda.gov/biotechnology/downloads/confirmation-response/23-023-02cr-request.pdf https://www.aphis.usda.gov/biotechnology/downloads/confirmation-response/23-023-02cr-response-signed.pdf	YES	21
NGT1	Soybean	single deletion in one CBI gene	Benson Hill, Inc.	Confirmation request submitted to APHIS	2023-04-19	https://www.aphis.usda.gov/biotechnology/downloads/confirmation-response/23-023-01cr-request.pdf https://www.aphis.usda.gov/biotechnology/downloads/confirmation-response/23-023-01cr-response-signed.pdf	YES	22
inferred NGT1	Soybean	modification of one CBI gene	Inari Agriculture, Inc.	Confirmation request submitted to APHIS	2023-04-11	https://www.aphis.usda.gov/biotechnology/downloads/confirmation-response/22-357-01cr-request.pdf https://www.aphis.usda.gov/biotechnology/downloads/confirmation-response/22-357-01cr-response-signed.pdf	YES	23
NGT1	Maize	19bp deletion in cenh3 gene	Syngenta Seeds, LLC	Confirmation request submitted to APHIS	2023-04-11	https://www.aphis.usda.gov/biotechnology/downloads/confirmation-response/23-062-01cr-request.pdf https://www.aphis.usda.gov/biotechnology/downloads/confirmation-response/23-062-01cr-response-signed.pdf	YES	24
NGT1	Rice	single bp substitution in the 4-hydroxyphenylpyruvate dioxygenase (hppd) gene	Bioheuris Inc.	Confirmation request submitted to APHIS	2023-03-21	https://www.aphis.usda.gov/biotechnology/downloads/confirmation-response/23-033-02cr-request.pdf https://www.aphis.usda.gov/biotechnology/downloads/confirmation-response/23-033-02cr-response-signed.pdf	YES	25
NGT1	Pennycress	Single genetic modification (e.g. 1bp insertion) of one CBI gene	CoverCress Inc.	Confirmation request submitted to APHIS	2023-02-21	https://www.aphis.usda.gov/biotechnology/downloads/confirmation-response/22-336-01cr-request.pdf https://www.aphis.usda.gov/biotechnology/downloads/confirmation-response/22-336-01cr-response-signed.pdf	YES	26
NGT1	Pennycress	Single genetic modification (e.g. 1bp insertion) of one CBI gene	CoverCress Inc.	Confirmation request submitted to APHIS	2023-02-21	https://www.aphis.usda.gov/biotechnology/downloads/confirmation-response/22-336-02cr-request.pdf https://www.aphis.usda.gov/biotechnology/downloads/confirmation-response/22-336-02cr-response-signed.pdf	YES	27
NGT1	Soybean	1 bp substitution in protoporphyrinogen oxidase 2 (ppo2) gene	Bioheuris Inc.	Confirmation request submitted to APHIS	2023-01-04	https://www.aphis.usda.gov/biotechnology/downloads/confirmation-response/22-269-01cr-request.pdf https://www.aphis.usda.gov/biotechnology/downloads/confirmation-response/22-269-01cr-response-signed.pdf	YES	28
NGT1	Rice	1 bp substitution in acetolactate synthase (als1) gene	Bioheuris Inc.	Confirmation request submitted to APHIS	2022-12-27	https://www.aphis.usda.gov/biotechnology/downloads/confirmation-response/22-276-01cr-request.pdf https://www.aphis.usda.gov/biotechnology/downloads/confirmation-response/22-276-01cr-response-signed.pdf	YES	29
NGT1	Cotton	1 bp substitution in protoporphyrinogen oxidase 2 (ppo2) gene	Bioheuris Inc.	Confirmation request submitted to APHIS	2022-12-19	https://www.aphis.usda.gov/biotechnology/downloads/confirmation-response/22-269-02cr-request.pdf https://www.aphis.usda.gov/biotechnology/downloads/confirmation-response/22-269-02cr-response-signed.pdf	YES	30
NGT1	Sweet Orange	Deletion in the LATERAL ORGAN BOUNDARIES 1 (LOB1) gene	University of Florida	Confirmation request submitted to APHIS	2022-12-19	https://www.aphis.usda.gov/biotechnology/downloads/confirmation-response/22-311-01cr-request.pdf https://www.aphis.usda.gov/biotechnology/downloads/confirmation-response/22-311-01cr-response-signed.pdf	YES	31
NGT1	Rice	38bp deletion in the MATRILINEAL (OsMATL) gene	Syngenta Seeds, LLC	Confirmation request submitted to APHIS	2022-11-04	https://www.aphis.usda.gov/biotechnology/downloads/confirmation-response/22-250-01cr-request.pdf https://www.aphis.usda.gov/biotechnology/downloads/confirmation-response/22-250-01cr-response-signed.pdf	YES	32
NGT1	Soybean	Deletion in one gene	Benson Hill, Inc.	Confirmation request submitted to APHIS	2022-10-11	https://www.aphis.usda.gov/biotechnology/downloads/confirmation-response/22-207-01cr-request.pdf https://www.aphis.usda.gov/biotechnology/downloads/confirmation-response/22-207-01cr-response-signed.pdf	YES	33
NGT1	Soybean	Deletion in one gene	Benson Hill, Inc.	Confirmation request submitted to APHIS	2022-10-11	https://www.aphis.usda.gov/biotechnology/downloads/confirmation-response/22-207-02cr-request.pdf https://www.aphis.usda.gov/biotechnology/downloads/confirmation-response/22-207-02cr-response-signed.pdf	YES	34
NGT1	Soybean	Deletion in one gene	Benson Hill, Inc.	Confirmation request submitted to APHIS	2022-10-11	https://www.aphis.usda.gov/biotechnology/downloads/confirmation-response/22-207-03cr-request.pdf https://www.aphis.usda.gov/biotechnology/downloads/confirmation-response/22-207-03cr-response-signed.pdf	YES	35
NGT1	Soybean	Deletion in one gene	Benson Hill, Inc.	Confirmation request submitted to APHIS	2022-10-11	https://www.aphis.usda.gov/biotechnology/downloads/confirmation-response/22-207-04cr-request.pdf https://www.aphis.usda.gov/biotechnology/downloads/confirmation-response/22-207-04cr-response-signed.pdf	YES	36
inferred NGT1	Blackberry	Insertion, deletion or substitution in one (CBI) gene	Pairwise Plants Services, Inc.	Confirmation request submitted to APHIS	2022-10-07	https://www.aphis.usda.gov/biotechnology/downloads/confirmation-response/22-213-01cr-request.pdf https://www.aphis.usda.gov/biotechnology/downloads/confirmation-response/22-213-01cr-response-signed.pdf	YES	37
NGT1	Mustard Greens	single genetic modification (e.g. deletion) of one CBI gene	Pairwise Plants Services, Inc.	Confirmation request submitted to APHIS	2022-10-07	https://www.aphis.usda.gov/biotechnology/downloads/confirmation-response/22-213-02cr-request.pdf https://www.aphis.usda.gov/biotechnology/downloads/confirmation-response/22-213-02cr-response-signed.pdf	YES	38
NGT1	Blackberry	single genetic modification (e.g. an amino acid substitution) of one CBI gene	Pairwise Plants Services, Inc.	Confirmation request submitted to APHIS	2022-10-07	https://www.aphis.usda.gov/biotechnology/downloads/confirmation-response/22-213-03cr-request.pdf https://www.aphis.usda.gov/biotechnology/downloads/confirmation-response/22-213-03cr-response-signed.pdf	YES	39
NGT1	Mustard Greens	single genetic modification (e.g. deletion) of one CBI gene	Pairwise Plants Services, Inc.	Confirmation request submitted to APHIS	2022-10-07	https://www.aphis.usda.gov/biotechnology/downloads/confirmation-response/22-213-04cr-request.pdf https://www.aphis.usda.gov/biotechnology/downloads/confirmation-response/22-213-04cr-response-signed.pdf	YES	40
NGT1	Sorghum	1 bp change in acetolactate synthase gene (ALS)	Bioheuris Inc.	Confirmation request submitted to APHIS	2022-09-06	https://www.aphis.usda.gov/biotechnology/downloads/confirmation-response/22-201-01cr-request.pdf https://www.aphis.usda.gov/biotechnology/downloads/confirmation-response/22-201-01cr-response-signed.pdf	YES	41
NGT1	Alfalfa	1 bp change in acetolactate synthase gene (ALS)	Bioheuris Inc.	Confirmation request submitted to APHIS	2022-08-18	https://www.aphis.usda.gov/biotechnology/downloads/confirmation-response/22-151-01cr-cbidel-a3-request.pdf https://www.aphis.usda.gov/biotechnology/downloads/confirmation-response/22-151-01cr-response-signed.pdf	YES	42
NGT1	Barley	17 basepairs deletion in QTL for seed dormancy 2 (Qsd2)	Hartwick College	Confirmation request submitted to APHIS	2022-08-09	https://www.aphis.usda.gov/biotechnology/downloads/confirmation-response/22-130-01cr-a2-request.pdf https://www.aphis.usda.gov/biotechnology/downloads/confirmation-response/22-130-01cr-response-signed.pdf	YES	43
Transgenic	Petunia	Insertion of transgene (including maize gene, 35S promoter and antibiotic resistance gene)	Ball Horticultural Company	Confirmation request submitted to APHIS	2022-05-27	https://www.aphis.usda.gov/biotechnology/downloads/confirmation-response/22-007-01cr-a1-request.pdf https://www.aphis.usda.gov/biotechnology/downloads/confirmation-response/22-007-01cr-response-signed.pdf	NO	44
inferred NGT1	Banana	Single change (CBI) in one polyphenol oxidase gene	Tropic Biosciences UK LTD	Confirmation request submitted to APHIS	2022-03-29	https://www.aphis.usda.gov/biotechnology/downloads/confirmation-response/21-356-01cr-cbidel-a4.pdf https://www.aphis.usda.gov/biotechnology/downloads/confirmation-response/21-356-01cr-response-signed.pdf	YES	45
Transgenic	Cotton	Insertion of the fungi gene HPPD (4-hydroxyphenylpyruvate dioxygenase)	PlantArcBio Ltd.	Confirmation request submitted to APHIS	2021-12-28	https://www.aphis.usda.gov/biotechnology/downloads/confirmation-response/21-264-02cr-a1.pdf https://www.aphis.usda.gov/biotechnology/downloads/confirmation-response/21-264-02cr-response-signed.pdf	NO	46
Transgenic	Soybean	Insertion of the fungi gene HPPD (4-hydroxyphenylpyruvate dioxygenase)	PlantArcBio Ltd.	Confirmation request submitted to APHIS	2021-12-28	https://www.aphis.usda.gov/biotechnology/downloads/confirmation-response/21-264-01cr-a1.pdf https://www.aphis.usda.gov/biotechnology/downloads/confirmation-response/21-264-01cr-response-signed.pdf	NO	47
Transgenic	Maize	Insertion of transgene (including maize, E.coli and agrobacterium genes)	Agrivida, Inc.	Confirmation request submitted to APHIS	2021-11-23	https://www.aphis.usda.gov/biotechnology/downloads/confirmation-response/21-271-01cr_a1.pdf https://www.aphis.usda.gov/biotechnology/downloads/confirmation-response/21-271-01cr_response_signed.pdf	NO	48
NGT1	Potato	18 bp substitution in stu-MIR398a to target PPO5 gene	Tropic Biosciences UK LTD	Confirmation request submitted to APHIS	2021-10-20	https://www.aphis.usda.gov/biotechnology/downloads/confirmation-response/21-141-01cr-a2-revised-final-signed.pdf https://www.aphis.usda.gov/biotechnology/downloads/confirmation-response/21-141-01cr-response-signed.pdf	YES	49
Transgenic	Cotton	Insertion of two bt proteins Cry1Ac and Cry2Ab	Bayer U.S. – Crop Science	Confirmation request submitted to APHIS	2021-08-31	https://www.aphis.usda.gov/biotechnology/downloads/confirmation-response/21-211-01cr-request.pdf https://www.aphis.usda.gov/biotechnology/downloads/confirmation-response/21-211-01cr-response-signed.pdf	NO	50
Transgenic	Petunia	Insertion of transgene (including maize dihydroflavonol 4-reductase (DFR) and antibiotic resistance gene)	Dümmen NA, Inc	Confirmation request submitted to APHIS	2021-08-25	https://www.aphis.usda.gov/biotechnology/downloads/confirmation-response/21-161-01cr-a2.pdf https://www.aphis.usda.gov/biotechnology/downloads/confirmation-response/21-161-01cr-response-signed.pdf	NO	51
NGT1	Nicotiana attenuata	3 bp deletion (NaASAT1-like), 1 bp insertion (NaASAT2-like, NaASAT3-like) or 1 bp substitution (NaTPS1-like)	Max Planck Institute for Chemical Ecology	Confirmation request submitted to APHIS	2021-06-10	https://www.aphis.usda.gov/biotechnology/downloads/confirmation-response/21-025-021cr_a3.pdf https://www.aphis.usda.gov/biotechnology/downloads/confirmation-response/21-025-01cr_response_signed.pdf	YES	52
Transgenic	Apple	Insertion of RNAi cassette (including antibiotic resistance gene)	Okanagan Specialty Fruits Inc.	Confirmation request submitted to APHIS	2021-05-20	https://www.aphis.usda.gov/biotechnology/downloads/confirmation-response/21-105-01cr.pdf https://www.aphis.usda.gov/biotechnology/downloads/confirmation-response/21-105-01cr_response_signed.pdf	NO	53
NGT1	Soybean	Single bp substitution in the acetolactate synthase (ALS) gene	Bioheuris, Inc.	Confirmation request submitted to APHIS	2021-05-03	https://www.aphis.usda.gov/biotechnology/downloads/confirmation-response/20-317-01cr_a2.pdf https://www.aphis.usda.gov/biotechnology/downloads/confirmation-response/20-317-01cr_response_signed.pdf	YES	54
inferred NGT1	NA	Insertion, deletion or substitution in one (CBI) gene	Yield10 Bioscience	Confirmation request submitted to APHIS	2021-04-28	https://www.aphis.usda.gov/biotechnology/downloads/confirmation-response/20-358-01cr_request_cbidel_a2.pdf https://www.aphis.usda.gov/biotechnology/downloads/confirmation-response/20-358-01cr_response_signed.pdf	YES	55
Transgenic	Pine	Insertion of transgene derived from A. thaliana and E. Coli	Living Carbon PBC	APHIS - am i regulated	2020-09-09	https://www.aphis.usda.gov/biotechnology/downloads/reg_loi/20-168-28_air_response_signed.pdf	YES	56
NGT1	Maize	Substitution to get 1 amino acid change (CBI)	Corteva Agriscience	APHIS - am i regulated	2020-09-08	https://www.aphis.usda.gov/biotechnology/downloads/reg_loi/20-168-23_air_inquiry_a1_cbidel.pdf	YES	57
inferred NGT1	Maize	Bp substitutions or small insertions (zmm28 promoter)	Corteva Agriscience	APHIS - am i regulated	2020-09-08	https://www.aphis.usda.gov/biotechnology/downloads/reg_loi/20-168-20_air_inquiry_cbidel.pdf	YES	58
NGT1	Soybean	3 bp substitutions in diacylglycerol acyltransferase (DGAT1B) gene	Corteva Agriscience	APHIS - am i regulated	2020-09-08	https://www.aphis.usda.gov/biotechnology/downloads/reg_loi/20-168-14_air_inquiry_nocbi.pdf	YES	59
NGT1	Maize	4 bp substitutions in the FASCIATED EAR3 (FEA3-2) gene	Corteva Agriscience	APHIS - am i regulated	2020-09-04	https://www.aphis.usda.gov/biotechnology/downloads/reg_loi/20-168-12_inquiry_nocbi.pdf	YES	60
inferred NGT1	Rapeseed	one to few base pair insertion or deletion	Corteva Agriscience	APHIS - am i regulated	2020-09-04	https://www.aphis.usda.gov/biotechnology/downloads/reg_loi/20-168-09_air_inquiry_a1_cbidel.pdf	YES	61
Transgenic	Tall fescue (Festuca arundinacea)	Insertion of transgene (including rice promoter and antibiotic resistance gene)	University of Georgia	APHIS - am i regulated	2020-09-04	https://www.aphis.usda.gov/biotechnology/downloads/reg_loi/20-062-05_a1_air_inquiry_cbidel.pdf	NO	62
NGT1	Soybean	216 bp deletion in one (CBI) gene	University of Missouri	APHIS - am i regulated	2020-09-03	https://www.aphis.usda.gov/biotechnology/downloads/reg_loi/20-147-01_air_a1_inquiry_cbidel.pdf https://www.aphis.usda.gov/biotechnology/downloads/reg_loi/20-147-01_air_response_signed.pdf	YES	63
NGT1	Soybean	Deletions in ten genes (CBI)	University of Missouri	APHIS - am i regulated	2020-09-03	https://www.aphis.usda.gov/biotechnology/downloads/reg_loi/20-147-02_air_a2_inquiry_cbidel.pdf	YES	64
Transgenic	Pine	Insertion of transgene (including A. thaliana promoter and antibiotic resistance gene)	Living Carbon PBC	APHIS - am i regulated	2020-09-03	https://www.aphis.usda.gov/biotechnology/downloads/reg_loi/20-168-25_air_inquiry_a1_cbidel.pdf	NO	65
Transgenic	Pine	Insertion of transgene (including A. thaliana promoter and antibiotic resistance gene)	Living Carbon PBC	APHIS - am i regulated	2020-09-03	https://www.aphis.usda.gov/biotechnology/downloads/reg_loi/20-168-26_air_inquiry_a1_cbidel.pdf	NO	66
Transgenic	Pine	Insertion of transgene (including A. thaliana promoter and antibiotic resistance gene)	Living Carbon PBC	APHIS - am i regulated	2020-09-03	https://www.aphis.usda.gov/biotechnology/downloads/reg_loi/20-168-27_air_inquiry_a1_cbidel.pdf	NO	67
Transgenic	Poplar	Insertion of transgene (including A. thaliana promoter and antibiotic resistance gene)	Living Carbon PBC	APHIS - am i regulated	2020-09-03	https://www.aphis.usda.gov/biotechnology/downloads/reg_loi/20-168-29_air_inquiry_a1_cbidel.pdf	NO	68
Not categorizable	Rapeseed	Cibus RTDSTM (changes CBI)	Cibus US LLC	APHIS - am i regulated	2020-08-31	https://www.aphis.usda.gov/biotechnology/downloads/reg_loi/20-168-24_air_inquiry_a1_cbidel.pdf	YES	69
Not categorizable	Rapeseed	Cibus RTDSTM (changes CBI)	Cibus US LLC	APHIS - am i regulated	2020-08-31	https://www.aphis.usda.gov/biotechnology/downloads/reg_loi/20-168-19_air_inquiry_a1_cbidel.pdf	YES	70
Not categorizable	Rapeseed	Cibus RTDSTM (changes CBI)	Cibus US LLC	APHIS - am i regulated	2020-08-31	https://www.aphis.usda.gov/biotechnology/downloads/reg_loi/20-168-17_air_inquiry_a1_cbidel.pdf	YES	71
Not categorizable	Rapeseed	Cibus RTDSTM (changes CBI)	Cibus US LLC	APHIS - am i regulated	2020-08-31	https://www.aphis.usda.gov/biotechnology/downloads/reg_loi/20-168-17_air_inquiry_a1_cbidel.pdf	YES	72
Not categorizable	Rapeseed	Cibus RTDSTM (changes CBI)	Cibus US LLC	APHIS - am i regulated	2020-08-31	https://www.aphis.usda.gov/biotechnology/downloads/reg_loi/20-168-15_air_inquiry_a1_cbidel.pdf	YES	73
Not categorizable	Rapeseed	Cibus RTDSTM (changes CBI)	Cibus US LLC	APHIS - am i regulated	2020-08-31	https://www.aphis.usda.gov/biotechnology/downloads/reg_loi/20-168-13_air_inquiry_a1_cbidel.pdf	YES	74
Not categorizable	Rapeseed	Cibus RTDSTM (changes CBI)	Cibus US LLC	APHIS - am i regulated	2020-08-31	https://www.aphis.usda.gov/biotechnology/downloads/reg_loi/20-168-11_air_inquiry_a1_cbidel.pdf	YES	75
Not categorizable	Rapeseed	Cibus RTDSTM (changes CBI)	Cibus US LLC	APHIS - am i regulated	2020-08-31	https://www.aphis.usda.gov/biotechnology/downloads/reg_loi/20-168-10_air_inquiry_a1_cbidel.pdf	YES	76
Transgenic	Sugarcane	Biolistic gene transfer of linearized transgene expression construct (suppression construt or RNAi)	University of Florida	APHIS - am i regulated	2020-08-31	https://www.aphis.usda.gov/biotechnology/downloads/reg_loi/20-168-22_air_inquiry_cbidel.pdf	NO	77
Transgenic	Bahiagrass	Biolistic gene transfer of linearized transgene expression construct (including RNAi supression cassette)	University of Florida	APHIS - am i regulated	2020-08-31	https://www.aphis.usda.gov/biotechnology/downloads/reg_loi/20-168-21_air_inquiry_a1_cbidel.pdf	NO	78
Transgenic	Sugarcane	Biolistic gene transfer of linearized transgene expression construct (suppression construt or RNAi)	University of Florida	APHIS - am i regulated	2020-08-31	https://www.aphis.usda.gov/biotechnology/downloads/reg_loi/20-168-16_air_inquiry_cbidel.pdf	NO	79
NGT1	Pennycress	1 bp insertion and 2 or 5 bp deletions (CBI)	CoverCress, Inc.	APHIS - am i regulated	2020-08-31	https://www.aphis.usda.gov/biotechnology/downloads/reg_loi/20-051-01_air_a1_Inquiry_cbidel.pdf	YES	80
Not categorizable	Rapeseed	Cibus RTDSTM (changes CBI)	Cibus US LLC	APHIS - am i regulated	2020-08-31	https://www.aphis.usda.gov/biotechnology/downloads/reg_loi/20-168-08_air_inquiry_cbidel.pdf	YES	81
Not categorizable	Rice	Cibus RTDSTM (changes CBI)	Cibus US LLC	APHIS - am i regulated	2020-08-31	https://www.aphis.usda.gov/biotechnology/downloads/reg_loi/20-167-01_air_inquiry_cbidel.pdf	YES	82
Transgenic	Soybean	Insertion of transgene derived from maize, virus and bacteria	University of Georgia	APHIS - am i regulated	2020-08-28	https://www.aphis.usda.gov/biotechnology/downloads/reg_loi/20-169-04_air__inquiry_nocbi.pdf	NO	83
Transgenic	Soybean	Insertion of transgene derived from A. thaliana, tomato and E. coli	University of Georgia	APHIS - am i regulated	2020-08-27	https://www.aphis.usda.gov/biotechnology/downloads/reg_loi/20-092-01_air_nocbi.pdf	NO	84
inferred NGT1	Rice	Insertion in promoter region of SWEET11, SWEET13 and SWEET14	University of Missouri	APHIS - am i regulated	2020-08-24	https://www.aphis.usda.gov/biotechnology/downloads/reg_loi/20-143-01_air_inquiry_a1.pdf	YES	85
inferred NGT1	Pennycress	CRISPR with four guide RNAs targeting at least two (CBI) genes	Illinois State University	APHIS - am i regulated	2020-08-24	https://www.aphis.usda.gov/biotechnology/downloads/reg_loi/20-142-01_air_inquiry_a1_cbidel.pdf	YES	86
Transgenic	Switchgrass	Insertion of CRISPR and not segregated out	University of Georgia	APHIS - am i regulated	2020-08-24	https://www.aphis.usda.gov/biotechnology/downloads/reg_loi/20-062-04_air_cbidel.pdf	YES	87
Not categorizable	Switchgrass	Insertion of an overexpression construct including maize promoter and rice terminator	University of Georgia	APHIS - am i regulated	2020-08-24	https://www.aphis.usda.gov/biotechnology/downloads/reg_loi/20-062-03_air_cbidel.pdf	NO	88
Not categorizable	Rapeseed	Cibus RTDSTM (changes CBI)	Cibus US LLC	APHIS - am i regulated	2020-08-18	https://www.aphis.usda.gov/biotechnology/downloads/reg_loi/20-168-04_air_inquiry_a1_cbidel.pdf	YES	89
NGT1	Rapeseed	Cibus RTDSTM (changes in SHP1A, SHP1C, SHP2A, SHP2C, SHP3A, SHP3C, SHP4A and/or SHP4C)	Cibus US LLC	APHIS - am i regulated	2020-08-18	https://www.aphis.usda.gov/biotechnology/downloads/reg_loi/20-160-01_air_inquiry_a1_cbidel.pdf Cibus Patent: https://patents.justia.com/patent/20230141977 https://patents.justia.com/patent/20230057587	YES	90
inferred NGT1	Potato	One or more insertions, deletions or substitutions in one Gene (CBI) or Ppo genes	J. R. Simplot Plant Sciences	APHIS - am i regulated	2020-08-06	https://www.aphis.usda.gov/biotechnology/downloads/reg_loi/20-168-06_air_inquiry_cbidel.pdf	YES	91
NGT1	Tomato	Substitution or deletions in three genes	Cold Spring Harbor Laboratory	APHIS - am i regulated	2020-08-12	https://www.aphis.usda.gov/biotechnology/downloads/reg_loi/20-149-01_air_inquiry_a1.pdf	YES	92
NGT1	Tomato	Insertion of one bp in calmodulin (CaM)-binding domain (CaMBD) of glutamate decarboxylase (GAD)	Sanatech Seed Co., Ltd.	APHIS - am i regulated	2020-08-12	https://www.aphis.usda.gov/biotechnology/downloads/reg_loi/20-140-01_air_CBIdel_a2.pdf	YES	93
Transgenic	tall fescue, perennial ryegrass, switchgrass, and seashore paspalum	Insertion of transgene derived from bacteria	University of Georgia	APHIS - am i regulated	2020-08-12	https://www.aphis.usda.gov/biotechnology/downloads/reg_loi/20-062-01_air_inquiry_a3_cbidel.pdf	NO	94
inferred NGT1	Rapeseed	Deactivation of multiple rapeseed genes (CBI) with CRISPR	Yield10 Bioscience	APHIS - am i regulated	2020-08-12	https://www.aphis.usda.gov/biotechnology/downloads/re g_loi/20-163-02_air_inquiry_a1_cbidel.pdf https://www.aphis.usda.gov/biotechnology/downloads/reg_loi/20-163-02_air_response_signed.pdf	YES	95
NGT1	Brown mustard	Deletions in up to three genes (CBI) with CRISPR	Pairwise	APHIS - am i regulated	2020-08-12	https://www.aphis.usda.gov/biotechnology/downloads/reg_loi/20-168-07_air_inquiry_a3_a2_cbidel.pdf	YES	96
inferred NGT1	Avocado	Insertion, deletion or substitution in one (CBI) gene	Green Venus LLC	APHIS - am i regulated	2020-08-07	https://www.aphis.usda.gov/biotechnology/downlo ads/reg_loi/20-163-01_air_inquiry_a1_cbidel.pdf https://www.aphis.usda.gov/biotechnology/downloads/reg_loi/20-163-01_air_response_signed.pdf	YES	97
inferred NGT1	Avocado	Small insertions, deletions or substitutions in one Ppo gene (CBI)	J.R. Simplot Plant Sciences	APHIS - am i regulated	2020-08-06	https://www.aphis.usda.gov/biotechnology/downloads/reg_loi/20-168-35_air_inquiry_a2_cbidel.pdf	YES	98
inferred NGT1	Strawberry	One or more insertions, deletions or substitutions in one (CBI) gene	J.R. Simplot Plant Sciences	APHIS - am i regulated	2020-08-06	https://www.aphis.usda.gov/biotechnology/downloads/reg_loi/20-168-05_air_inquiry_a1_cbidel.pdf	YES	99
inferred NGT1	Tomato	Deletions or insertions in one or two genes (CBI)	Inari Agriculture, Inc.	APHIS - am i regulated	2020-08-06	https://www.aphis.usda.gov/biotechnology/downloads/reg_loi/20-168-32_air_inquiry_cbidel.pdf	YES	100
inferred NGT1	Soybean	Deletions, substitutions or insertions in up to five (CBI) genes	Inari Agriculture, Inc.	APHIS - am i regulated	2020-08-06	https://www.aphis.usda.gov/biotechnology/downloads/reg_loi/20-168-31_air_inquiry_a1_cbidel.pdf	YES	101
inferred NGT1	Potato	One or more insertions, deletions or substitutions in one (CBI) gene	J.R. Simplot Plant Sciences	APHIS - am i regulated	2020-08-06	https://www.aphis.usda.gov/biotechnology/downloads/reg_loi/20-168-33_air_inquiry_a1_cbidel.pdf	YES	102
inferred NGT1	Potato	One or more insertions, deletions or substitutions in one (CBI) gene	J.R. Simplot Plant Sciences	APHIS - am i regulated	2020-08-06	https://www.aphis.usda.gov/biotechnology/downloads/reg_loi/20-168-03_air_inquiry_cbidel.pdf	YES	103
inferred NGT1	Maize	Deletions or insertions in up to four (CBI) genes	Inari Agriculture, Inc.	APHIS - am i regulated	2020-08-06	https://www.aphis.usda.gov/biotechnology/downloads/reg_loi/20-168-30_air_inquiry_cbidel.pdf	YES	104
inferred NGT1	Potato	One or more insertions, deletions or substitutions in one (CBI) gene	J.R. Simplot Plant Sciences	APHIS - am i regulated	2020-08-06	https://www.aphis.usda.gov/biotechnology/downloads/reg_loi/20-168-02_air_inquiry_cbidel.pdf	YES	105
NGT1	Potato	One or more deletions in one (CBI) gene	J.R. Simplot Plant Sciences	APHIS - am i regulated	2020-08-06	https://www.aphis.usda.gov/biotechnology/downloads/reg_loi/20-168-34_air_inquiry_cbidel_a1.pdf	YES	106
inferred NGT1	Potato	One or more insertions, deletions or substitutions in Ppo genes	J.R. Simplot Plant Sciences	APHIS - am i regulated	2020-08-06	https://www.aphis.usda.gov/biotechnology/downloads/reg_loi/20-168-01_air_inquiry_cbidel.pdf	YES	107
inferred NGT1	Tree Tobacco	Small insertions or deletions in NgCER1- and NgCER3-like, NgKCS6-like, NgFAR3-like, gABCG32-like genes	Weizmann Institute of Science	APHIS - am i regulated	2020-08-06	https://www.aphis.usda.gov/biotechnology/downloads/reg_loi/20-044-01_air_inquiry_a1.pdf DOI: 10.1111/nph.18615	YES	108
NGT1	Barley	Deletions in the NUD gene	Oregon State University	APHIS - am i regulated	2020-08-06	https://www.aphis.usda.gov/biotechnology/downloads/reg_loi/20-113-01_air_inquiry.pdf	YES	109
Transgenic	Seashore Paspalum	Insertion of a transgene derived from rice, maize and E. coli	University of Georgia	APHIS - am i regulated	2020-07-30	https://www.aphis.usda.gov/biotechnology/downloads/reg_loi/20-059-01-a2-air-inquiry.pdf	NO	110
Transgenic	Switchgrass	Insertion of a transgene derived from rice, maize and E. coli	University of Georgia	APHIS - am i regulated	2020-07-22	https://www.aphis.usda.gov/biotechnology/downloads/reg_loi/20-062-02-a1-air-inquiry.pdf	NO	111
NGT1	Soybean	Deletions in fatty acid desaturase 2 (FAD2)	ToolGen, Inc.	APHIS - am i regulated	2020-07-21	https://www.aphis.usda.gov/biotechnology/downloads/reg_loi/20-093-01-a1-air-inquiry-cbidel.pdf	YES	112
NGT1	Pea	Deletion in one (CBI) gene	Benson Hill, Inc.	APHIS - am i regulated	2020-07-21	https://www.aphis.usda.gov/biotechnology/downloads/reg_loi/20-108-01-air-a1-cbidel.pdf	YES	113
Not categorizable	Ziysuagrass	Insertion of seven (CBI) (trans)genes	Scotts Miracle-Gro Company	APHIS - am i regulated	2020-07-21	https://www.aphis.usda.gov/biotechnology/downloads/reg_loi/19-266-03-air-a1-cbidel.pdf	NO	114
Not categorizable	Tall fescue	Insertion of seven (CBI) (trans)genes	Scotts Miracle-Gro Company	APHIS - am i regulated	2020-07-21	https://www.aphis.usda.gov/biotechnology/downloads/reg_loi/19-266-02-air-a1-inquiry-cbidel.pdf	NO	115
Transgenic	Poplar	Insertion of transgene derived fromf A. thaliana and E. coli	Living Carbon PBC	APHIS - am i regulated	2020-07-02	https://www.aphis.usda.gov/biotechnology/downloads/reg_loi/20-092-04-air-cbidel-a3.pdf	NO	116
Transgenic	Poplar	Insertion of transgene derived fromf A. thaliana and E. coli	Living Carbon PBC	APHIS - am i regulated	2020-07-02	https://www.aphis.usda.gov/biotechnology/downloads/reg_loi/20-092-03-air-cbidel-a3.pdf	NO	117
Transgenic	Popar	Insertion of transgene derived fromf A. thaliana and E. coli	Living Carbon PBC	APHIS - am i regulated	2020-07-02	https://www.aphis.usda.gov/biotechnology/downloads/reg_loi/20-092-02-air-cbidel-a3.pdf	NO	118
NGT1	Tomato	1 bp insertion or deletions in jointless2 (J2) gene	University of Florida	APHIS - am i regulated	2020-07-01	https://www.aphis.usda.gov/biotechnology/downloads/reg_loi/19-282-01-a3-air-inquiry-cbidel.pdf	YES	119
Transgenic	Orchid	Insertion of transgene (including RNAi to silence phytoene synthase gene and Agrobacterium and E. Coli genes)	University of Tsukuba	APHIS - am i regulated	2020-06-15	https://www.aphis.usda.gov/biotechnology/downloads/reg_loi/19-231-01-air-inquiry.pdf	NO	120
Transgenic	Sugarcane	Insertion of transgene (including herbicide resistant gene variant of Sorghum bicolor and RNAi suppression cassette)	University of Florida	APHIS - am i regulated	2020-06-12	https://www.aphis.usda.gov/biotechnology/downloads/reg_loi/20-078-01-air-inquiry-cbidel-a2.pdf	NO	121
NGT1	Soybean	Deletions in five genes	Calyxt, Inc.	APHIS - am i regulated	2020-05-28	https://www.aphis.usda.gov/biotechnology/downloads/reg_loi/20-066-01-air-cbidel.pdf	YES	122
Not categorizable	Rice	Cibus RTDSTM (changes CBI)	Cibus US LLC	APHIS - am i regulated	2020-05-26	https://www.aphis.usda.gov/biotechnology/downloads/reg_loi/18-348-01-a9-air-inquiry-cbidel.pdf no acces https://www.aphis.usda.gov/biotechnology/downloads/reg_loi/18-348-01-air-response-signed.pdf	YES	123
Not categorizable	Flax	Cibus RTDSTM (changes CBI)	Cibus US LLC	APHIS - am i regulated	2020-05-22	https://www.aphis.usda.gov/biotechnology/downloads/reg_loi/18-351-01-air-response-signed.pdf	YES	124
NGT1	Pennycress	Single bp insertions or deletions in four (CBI) genes	CoverCress Inc.	APHIS - am i regulated	2020-05-07	https://www.aphis.usda.gov/biotechnology/downloads/reg_loi/19-346-01_air_inquiry_cbidel.pdf	YES	125
NGT1	Petunia	1 bp insertion in one (CBI) gene	ToolGen, Inc.	APHIS - am i regulated	2020-04-28	https://www.aphis.usda.gov/biotechnology/downloads/reg_loi/19-338-01_air_inquiry_cbidel_a1.pdf	YES	126
inferred NGT1	False flax	Deletions in more than one target (CBI) gene	Yield10 Bioscience	APHIS - am i regulated	2020-04-23	https://www.aphis.usda.gov/biotechnology/downloads/reg_loi/20-010-01_air_response_signed.pdff	YES	127
Transgenic	Sugarcane	Biolistic transfer of a linearized transgene expression construct (CBI)	University of Florida	APHIS - am i regulated	2020-03-17	https://www.aphis.usda.gov/biotechnology/downloads/reg_loi/19-095-01_air_inquiry_cbidel_a1.pdf	NO	128
Not categorizable	Soybean	Overexpression of one (CBI) gene	Evogene, Ltd.	APHIS - am i regulated	2020-03-10	https://www.aphis.usda.gov/biotechnology/downloads/reg_loi/19-218-03_a2_air_inquiry_cbidel.pdf	YES	129
inferred NGT1	Soybean	Insertions or deletions in one (CBI) gene by double-strand break	Evogene, Ltd.	APHIS - am i regulated	2020-03-10	https://www.aphis.usda.gov/biotechnology/downloads/reg_loi/19-218-02_a2_air_inquiry_cbidel.pdf	YES	130
NGT1	Tomato	16 bp insertion or deletions in SpASAT2, SpASFF1, SlASAT1 or SlASAt4	Michigan State University	APHIS - am i regulated	2020-02-14	https://www.aphis.usda.gov/biotechnology/downloads/reg_loi/19-143-01_air_inquiry_a1.pdf	YES	131
NGT1	Citrus tree	Deletion in one gene (LOB1)	Soilcea	APHIS - am i regulated	2020-01-29	https://www.aphis.usda.gov/biotechnology/downloads/reg_loi/19-260-01_air_inquiry_cbidel.pdf	YES	132
NGT1	Pennycress	Single bp insertions or deletions in three (CBI) genes	CoverCress Inc.	APHIS - am i regulated	2020-01-29	https://www.aphis.usda.gov/biotechnology/downloads/reg_loi/19-218-01_air_inquiry_cbidel.pdf https://www.aphis.usda.gov/biotechnology/downloads/reg_loi/19-218-01_air_supporting_data_cbidel.pdf	YES	133
inferred NGT1	Pennycress	Insertion, deletion or substitution in one (CBI) gene	Illinois State University	APHIS - am i regulated	2020-01-29	https://www.aphis.usda.gov/biotechnology/downloads/reg_loi/19-189-01_air_inquiry_cbidel.pdf https://www.aphis.usda.gov/biotechnology/downloads/reg_loi/19-189-01_air_inquiry_cbidel.pdf	YES	134
NGT1	Tobacco	Deletions in an unknown number of (CBI) genes (max. 12)	Altria Client Services LLC	APHIS - am i regulated	2019-07-31	https://www.aphis.usda.gov/biotechnology/downloads/reg_loi/19-101-01_air_inquiry_a1_cbidel.pdf	YES	135
inferred NGT2	Tomato	Insertion of tomato sequences (RNAi) to target viurses	Nexgen Plants Pty Ltd	APHIS - am i regulated	2019-07-02	https://www.aphis.usda.gov/biotechnology/downloads/reg_loi/19-095-02_air_response_signed.pdf	NO	136
NGT1	Soybean	8 bp deletion in the 16gGlyma218000 gene	University of Minnesota	APHIS - am i regulated	2019-06-17	https://www.aphis.usda.gov/biotechnology/downloads/reg_loi/19-077-01_air_inquiry.pdf	YES	137
NGT1	Soybean	Deletions in three (CBI) genes	University of Minnesota	APHIS - am i regulated	2019-06-17	https://www.aphis.usda.gov/biotechnology/downloads/reg_loi/19-077-02_air_inquiry_cbidel.pdf	YES	138
inferred NGT1	Pennycress	Insertion or deletion in the tt8 gene	Illinois State University	APHIS - am i regulated	2019-04-19	https://www.aphis.usda.gov/biotechnology/downloads/reg_loi/18-337-01_a2_air_cbidel.pdf https://www.aphis.usda.gov/biotechnology/downloads/reg_loi/18-337-01_a2_air_data_cbidel.pdf	YES	139
NGT1	Tobacco	Two single bp insertions in NEC3a or NEC1b and NEC1d	Max Planck Institute for Chemical Ecology	APHIS - am i regulated	2019-02-25	only response https://www.aphis.usda.gov/biotechnology/downloads/reg_loi/18-248-01_air_response_signed.pdf	YES	140
inferred NGT1	Lettuce	Deletions in an unknown number of (CBI) genes	Intrexon Corporation	APHIS - am i regulated	2019-02-08	https://www.aphis.usda.gov/biotechnology/downloads/reg_loi/18-243-01_a4_air_cbidel.pdf	YES	141
Transgenic	Chrysanthemum	Insertion of transgene derived from E. coli and Agrobacterium	Suntory Flowers Limited	APHIS - am i regulated	2018-10-22	https://www.aphis.usda.gov/biotechnology/downloads/reg_loi/18-009-01_air_inquiry_a1.pdf	NO	142
inferred NGT1	False flax	Insertions or deletions in three (CBI) genes	Yield10 Bioscience	APHIS - am i regulated	2018-09-27	https://www.aphis.usda.gov/biotechnology/downloads/reg_loi/18-142-01_air_inquiry_cbidel.pdf	YES	143
NGT1	Pennycress	1 bp insertion or small deletion in one (CBI) gene	Illinois State University	APHIS - am i regulated	2018-08-06	https://www.aphis.usda.gov/biotechnology/downloads/reg_loi/18-036-01_a1_air_inquiry_cbidel.pdf	YES	144
NGT1	Maize	1 bp insertion and 50 bp deletion in one (CBI) gene	Iowa State University	APHIS - am i regulated	2018-07-12	https://www.aphis.usda.gov/biotechnology/downloads/reg_loi/18-110-01_air_inquiry_cbidel_a2.pdf	YES	145
Transgenic	Soybean	Insertion of transgene derived from tomato, potato, rice, pea and E. Coli genes	University of Georgia	APHIS - am i regulated	2018-05-18	https://www.aphis.usda.gov/biotechnology/downloads/reg_loi/18-092-01_air_inquiry.pdf	NO	146
Transgenic	Soybean	Insertion of transgene derived from tomato, potato, rice, pea and E. Coli	University of Georgia	APHIS - am i regulated	2018-05-18	https://www.aphis.usda.gov/biotechnology/downloads/reg_loi/18-086-01_air_inquiry_a1.pdf	NO	147
NGT1	Tomato	Deletion in Jointless2 gene	University of Florida	APHIS - am i regulated	2018-05-14	https://www.aphis.usda.gov/biotechnology/downloads/reg_loi/18-051-01_a1_air_inquiry.pdf	YES	148
Transgenic	Fragrant moss	Insertion of transgene derived from diverse plants and jellyfish	TAXA Biotechnologies, Inc.	APHIS - am i regulated	2018-03-30	https://www.aphis.usda.gov/biotechnology/downloads/reg_loi/17-045-01_air_inquiry_nocbi_noPII.pdf	NO	149
NGT1	Wheat	Deletion in one (CBI) gene	Calyxt, Inc.	APHIS - am i regulated	2018-03-20	https://www.aphis.usda.gov/biotechnology/downloads/reg_loi/17-038-01_air_inquiry_cbidel.pdf	YES	150
Transgenic	Maize	Insertion of transgene to change two amino acids, transformed via biolisitcs containing genome editing elements, not segregated	Benson Hill Biosystems, Inc.	APHIS - am i regulated	2018-03-19	https://www.aphis.usda.gov/biotechnology/downloads/reg_loi/17-298-01_air_inquiry_cbidel.pdf	NO	151
NGT2	Rice	Insertion of an intragenesis construct	Texas A&M University	APHIS - am i regulated	2018-03-14	https://www.aphis.usda.gov/biotechnology/downloads/reg_loi/17-286-01_01_air_inquiry.pdf	NO	152
NGT1	Maize	Targeted allele replacement with the corn NLB18 resistance allele	DuPont Pioneer	APHIS - am i regulated	2018-01-16	https://www.aphis.usda.gov/biotechnology/downloads/reg_loi/17-076-01_air_inquiry_cbidel.pdf https://www.aphis.usda.gov/biotechnology/downloads/reg_loi/17-076-01_air_inquiry_a1_cbidel.pdf	YES	153
NGT1	Tobacco	Deletions (1bp to 106 bp) in Berberine Bridge Enzyme-Like (BBL) gene	North Carolina State University	APHIS - am i regulated	2017-12-29	https://www.aphis.usda.gov/biotechnology/downloads/reg_loi/17-126-01_air_inquiry.pdf https://www.aphis.usda.gov/biotechnology/downloads/reg_loi/17-126-01_air_support_cbidel.pdf	YES	154
inferred NGT1	Soybean	Insertions, deletions or substitutions in Drb2a and Drb2b	USDA ARS	APHIS - am i regulated	2017-10-16	https://www.aphis.usda.gov/biotechnology/downloads/reg_loi/17-219-01_air_inquiry.pdf	YES	155
NGT1	Alfalfa	Deletion in one (CBI) gene	Calyxt, Inc.	APHIS - am i regulated	2017-09-25	https://www.aphis.usda.gov/biotechnology/downloads/reg_loi/17-038-02_air_inquiry_cbidel.pdf	YES	156
Transgenic	Potato	Insertion of transgene obtained via Agrobacterium (flanking sequences present?)	Simplot Plant Sciences	APHIS - am i regulated	2017-09-20	https://www.aphis.usda.gov/biotechnology/downloads/reg_loi/17-122-02_air.pdf	NO	157
Transgenic	Potato	Insertion of transgene obtained via Agrobacterium (flanking sequences present?)	Simplot Plant Sciences	APHIS - am i regulated	2017-09-20	https://www.aphis.usda.gov/biotechnology/downloads/reg_loi/17-122-01_air.pdf	NO	158
NGT1	False flax	1 bp insertion in three copies of one (CBI) gene	Yield10 Bioscience	APHIS - am i regulated	2017-08-29	https://www.aphis.usda.gov/biotechnology/downloads/reg_loi/17-166-01_air_inquiry_cbidel.pdf	YES	159
inferred NGT1	Green foxtail	Insertion, deletion or substitution in ID1 gene	Donald Danforth Plant Science Center	APHIS - am i regulated	2017-04-07	https://www.aphis.usda.gov/biotechnology/downloads/reg_loi/16-066-01_air_inquiry.pdf	YES	160
NGT1	Soybean	Insertion of transgene to silence Msh1 and segregating this transgene out	Epicrop Technologies, Inc.	APHIS - am i regulated	2017-04-07	https://www.aphis.usda.gov/biotechnology/downloads/reg_loi/17-004-01_air_inquiry.pdf	YES	161
Not categorizable	Barley	New barley transformation method, similar to CRISPR (AC/DS)	USDA ARS	APHIS - am i regulated	2017-03-20	https://www.aphis.usda.gov/biotechnology/downloads/reg_loi/16-124-01_air_inquiry.pdf	Not categorizable	162
Transgenic	Silvergrass	Insertion of transgene derived from rice, A. thaliana and confering antibiotic resistance	Ceres, Inc.	APHIS - am i regulated	2017-02-28	https://www.aphis.usda.gov/biotechnology/downloads/reg_loi/13-231-01_air_inquiry.pdf https://www.aphis.usda.gov/biotechnology/downloads/reg_loi/13-231-02_air_inquiry.pdf	NO	163
Transgenic	Bahiagrass	Insertion of transgene derived of sorghum, antibiotic resistance	University of Florida	APHIS - am i regulated	2017-02-16	https://www.aphis.usda.gov/biotechnology/downloads/reg_loi/16-293-01_air_inquiry.pdf	NO	164
Transgenic	Bahiagrass	Insertion of transgene derived of sorghum, ubiquitin promotor in front of ALS-gene, and gene of bahiagras	University of Florida	APHIS - am i regulated	2017-02-16	https://www.aphis.usda.gov/biotechnology/downloads/reg_loi/16-293-02_air_inquiry.pdf	NO	165
Transgenic	Bahiagrass	Insertion of transgene derived of sorghum, Ubiquitin promotor in front of ALS-gene	University of Florida	APHIS - am i regulated	2017-02-16	https://www.aphis.usda.gov/biotechnology/downloads/reg_loi/16-293-03_air_inquiry.pdf	NO	166
Transgenic	Tobacco	Insertion of transgene, synthetic gene (Luciferase)	Glowing Plant, Inc.	APHIS - am i regulated	2016-12-19	https://www.aphis.usda.gov/biotechnology/downloads/reg_loi/15-264-01_air_inquiry.pdf	NO	167
Transgenic	Tobacco	Insertion of transgene, synthetic gene (luciferase)	Glowing Plant, Inc.	APHIS - am i regulated	2016-12-19	https://www.aphis.usda.gov/biotechnology/downloads/reg_loi/15-296-01_air_inquiry.pdf	NO	168
NGT1	Potato	Small deletion in PPO5 gene	Simplot Plant Sciences	APHIS - am i regulated	2016-12-02	https://www.aphis.usda.gov/biotechnology/downloads/reg_loi/16-320-01_air_inquiry.pdf	YES	169
NGT1	Potato	Small deletion in PPO gene	Calyxt, Inc.	APHIS - am i regulated	2016-09-15	https://www.aphis.usda.gov/biotechnology/downloads/reg_loi/16-090-01_air_inquiry_cbidel.pdf	YES	170
Transgenic	Sorghum	Insertion of transgene derived from E. Coli, A. thaliana	Ceres, Inc.	APHIS - am i regulated	2016-07-18	https://www.aphis.usda.gov/biotechnology/downloads/reg_loi/15-202-01_air_inquiry_a1_cbidel.pdf	NO	171
Transgenic	Sugarcane	Insertion of transgene, promotor gene combinations of CBI species	Ceres, Inc.	APHIS - am i regulated	2016-06-03	https://www.aphis.usda.gov/biotechnology/downloads/reg_loi/15-035-01_air_inquiry_cbidel.pdf	NO	172
Transgenic	Sugarcane	Insertion of transgene derived from E. Coli, A. thaliana	Ceres, Inc.	APHIS - am i regulated	2016-06-03	https://www.aphis.usda.gov/biotechnology/downloads/reg_loi/15-264-02_air_inquiry_cbidel.pdf	NO	173
Transgenic	Roses	Insertion of transgene via agrobacteria	Suntory Global Innovation Center Limited	APHIS - am i regulated	2016-05-20	https://www.aphis.usda.gov/biotechnology/downloads/reg_loi/15-324-02_air_inquiry.pdf	NO	174
NGT1	Maize	Deletion in WX1 gene	DuPont Pioneer	APHIS - am i regulated	2016-04-18	https://www.aphis.usda.gov/biotechnology/downloads/reg_loi/15-352-01_air_inquiry_cbidel.pdf	YES	175
Transgenic	Tobacco	Insertion of transgene derived from bacteria	Bayer CropScience	APHIS - am i regulated	2016-03-17	https://www.aphis.usda.gov/biotechnology/downloads/reg_loi/15-352-02_air_inquiry.pdf	NO	176
inferred NGT1	Wheat	Insertion, deletion or substitution in MLO gene	Calyxt, Inc.	APHIS - am i regulated	2016-02-11	https://www.aphis.usda.gov/biotechnology/downloads/reg_loi/15-238-01_air_inquiry_cbidel.pdf	YES	177
Transgenic	Maize	Insertion of transgene derived from E. Coli, A. thaliana	Ceres, Inc.	APHIS - am i regulated	2016-02-08	https://www.aphis.usda.gov/biotechnology/downloads/reg_loi/13-242-01_air_cbidel.pdf	NO	178
NGT1	Maize	Deletion in one (CBI) gene	Agrivida, Inc.	APHIS - am i regulated	2015-11-30	https://www.aphis.usda.gov/biotechnology/downloads/reg_loi/15-078-02_air_inquiry.pdf	YES	179
NGT1	Tobacco	Insertion of transgene to express FT and segregating all geneteic material out	Arnold and Porter, LLP	APHIS - am i regulated	2015-11-30	https://www.aphis.usda.gov/biotechnology/downloads/reg_loi/15-120-01_air_inquiry.pdf	NO	180
NGT1	Rice	Deletion of few bp in promoter region of SWEET14 and SWEET11	Iowa State University	APHIS - am i regulated	2015-05-22	https://www.aphis.usda.gov/biotechnology/downloads/reg_loi/air_isu_ting_Rice.pdf	YES	181
NGT1	Soybean	Deletions in two FAD3 genes	Cellectis Plant Sciences	APHIS - am i regulated	2015-05-20	https://www.aphis.usda.gov/biotechnology/downloads/reg_loi/15-071-01air.pdf	YES	182
Transgenic	Maize	Insertion of transgene including antibiotic resistance	Benson Hill Biosystems, Inc.	APHIS - am i regulated	2015-05-18	https://www.aphis.usda.gov/biotechnology/downloads/reg_loi/15-013-01air.pdf	YES	183
NGT1	Soybean	Deletions in two FAD2 genes	Cellectis Plant Sciences	APHIS - am i regulated	2015-05-05	https://www.aphis.usda.gov/biotechnology/downloads/reg_loi/cellectis_air_fad2k0_soy_cbidel.pdf https://www.aphis.usda.gov/biotechnology/downloads/reg_loi/brs_response_cellectis_air_fad2k0_soy_cbidel.pdf	YES	184
Transgenic	Arabidopsis	Insertion of transgene derived from jelllyfish; biolistically transformed	Glowing Plant, Inc.	APHIS - am i regulated	2014-12-23	https://www.aphis.usda.gov/biotechnology/downloads/reg_loi/air_glowing_plant_bioluminescent_a_thaliana.pdf https://www.aphis.usda.gov/biotechnology/downloads/reg_loi/brs_air_response_glowing_plant_bioluminescent_a_thaliana.pdf	NO	185
Transgenic	Loblolly pine	Insertion of transgene via biolisitcs, derived from E. coli, sweetgum, A. thaliana	ArborGen, Inc.	APHIS - am i regulated	2014-08-28	https://www.aphis.usda.gov/biotechnology/downloads/reg_loi/arborgen_air_loblly_pine.pdf https://www.aphis.usda.gov/biotechnology/downloads/reg_loi/brs_resp_arborgen_loblolly_pine.pdf	NO	186
inferred NGT1	Potato	Insertion, deletion or substitution in one (CBI) gene	Cellectis Plant Sciences	APHIS - am i regulated	2014-08-28	https://www.aphis.usda.gov/biotechnology/downloads/reg_loi/Cellectis_inquiry_Potato.pdf https://www.aphis.usda.gov/biotechnology/downloads/reg_loi/aphis_response_cellectis_Potato.pdf	YES	187
Transgenic	Tomato	Insertion of transgene with 'virus based plasmids'	Rutgers University	APHIS - am i regulated	2014-08-26	https://www.aphis.usda.gov/biotechnology/downloads/reg_loi/rutgers_air_traitup_plasmids.pdf https://www.aphis.usda.gov/biotechnology/downloads/reg_loi/rutgers_air_traitup_plasmids_add_info.pdf https://www.aphis.usda.gov/biotechnology/downloads/reg_loi/brs_resp_rutgers_traitup_plasmids.pdf	NO	188
Transgenic	Sorghum	Insertion of transgene derived from sorghum, A. thaliana , E. coli; obtains neomycin resistance	Ceres, Inc.	APHIS - am i regulated	2014-08-06	https://www.aphis.usda.gov/biotechnology/downloads/reg_loi/ceres_reg_loi_ge_sorghum.pdf https://www.aphis.usda.gov/biotechnology/downloads/reg_loi/brs_resp_ceres_reg_loi_ge_sorghum.pdf https://www.aphis.usda.gov/biotechnology/downloads/reg_loi/13-053-01_air_response_signed_360.pdf	NO	189
Transgenic	Kalanchoe	Insertion of transgene derived from Agrobacterium thizogenes ATCC15834	CBI	APHIS - am i regulated	2014-06-24	https://www.aphis.usda.gov/biotechnology/downloads/reg_loi/air_loi_dwarf_kalanchoe.pdf https://www.aphis.usda.gov/biotechnology/downloads/reg_loi/brs_resp_air_dwarf_kalanchoe.pdf	NO	190
Transgenic	Soybean	Insertion of transgene (via biolistics) derived from E. coli, potato	University of Georgia	APHIS - am i regulated	2014-01-22	https://www.aphis.usda.gov/biotechnology/downloads/reg_loi/uga_reg_loi_ge_soy.pdf https://www.aphis.usda.gov/biotechnology/downloads/reg_loi/brs_resp_uga_reg_loi_ge_Soybean.pdf	NO	191
Transgenic	Tall fescue	Insertion of transgene derived from 'various plant species'	Scotts Miracle-Gro Company	APHIS - am i regulated	2014-01-06	https://www.aphis.usda.gov/biotechnology/downloads/reg_loi/scotts_tall_fescue_air_cbidel_20130903.pdf https://www.aphis.usda.gov/biotechnology/downloads/reg_loi/brs_resp_scotts_tall_fescue_air.pdf	NO	192
Not categorizable	CBI	CBI	BioGlow, LLC	APHIS - am i regulated	2013-03-21	https://www.aphis.usda.gov/biotechnology/downloads/reg_loi/BioGlow_Inquiry_102312_cbi_del.pdf https://www.aphis.usda.gov/biotechnology/downloads/reg_loi/aphis_response_bioglow_032113.pdf	Not categorizable	193
Transgenic	Pineapple	Insertion of transgene including RNAi to suppress bLyc and eLyc, including different genes e.g. potato, tangerine, tobacco	Del Monte Fresh Produce Company	APHIS - am i regulated	2013-01-25	https://www.aphis.usda.gov/biotechnology/downloads/reg_loi/del_monte_inquiry_letter.pdf https://www.aphis.usda.gov/biotechnology/downloads/reg_loi/aphis_response_del_monte.pdf	NO	194
Transgenic	Switchgrass	Insertion of transgene derived from barley, A. thaliana, rice or E. coli	Ceres, Inc.	APHIS - am i regulated	2013-01-02	https://www.aphis.usda.gov/biotechnology/downloads/reg_loi/Ceres_switchgrass_TRG101W_loi.pdf https://www.aphis.usda.gov/biotechnology/downloads/reg_loi/Ceres_switchgrass_TRG106E_loi.pdf https://www.aphis.usda.gov/biotechnology/downloads/reg_loi/Ceres_switchgrass_TRG107E_loi.pdf https://www.aphis.usda.gov/biotechnology/downloads/reg_loi/Ceres_switchgrass_TRG108E_loi.pdf https://www.aphis.usda.gov/…	NO	195
Transgenic	CBI	CBI, transgenic	BioGlow, LLC	APHIS - am i regulated	2012-09-20	https://www.aphis.usda.gov/biotechnology/downloads/reg_loi/BioGlow_loi_061512.pdf https://www.aphis.usda.gov/biotechnology/downloads/reg_loi/APHIS_response_BioGlow_092012.pdf	Not categorizable	196
NGT1	Sorghum	Insertion of transgene to downregulate MSH1 and segregating this transgene out	University of Nebraska Lincoln	APHIS - am i regulated	2012-06-06	https://www.aphis.usda.gov/biotechnology/downloads/reg_loi/Mackenzie_Letter_Null_Segregants_Dec%2011.pdf https://www.aphis.usda.gov/biotechnology/downloads/reg_loi/Response_Mackenzie_060612.pdf	NO	197
Transgenic	Kentucky bluegrass	Insertion of transgene derived from A.thaliana and spinach	Scotts Miracle-Gro Company	APHIS - am i regulated	2012-05-08	https://www.aphis.usda.gov/biotechnology/downloads/reg_loi/Scotts_St_Augustine_013112.pdf https://www.aphis.usda.gov/biotechnology/downloads/reg_loi/Scotts_May2012_St_Augustinegrass.pdf	NO	198
Transgenic	Kentucky bluegrass	Insertion of transgene derived from 'various plant species'	Scotts Miracle-Gro Company	APHIS - am i regulated	2012-05-08	https://www.aphis.usda.gov/biotechnology/downloads/reg_loi/Scotts_KBG_013112.pdf https://www.aphis.usda.gov/biotechnology/downloads/reg_loi/scotts_0512_kbg.pdf	NO	199
Transgenic	Switchgrass	Insertion of transgene derieved from A.thaliana, E.coli, Sorghum and obtaining antibiotic resistence	Ceres, Inc.	APHIS - am i regulated	2012-04-24	https://www.aphis.usda.gov/biotechnology/downloads/reg_loi/Ceres_LOI.pdf https://www.aphis.usda.gov/biotechnology/downloads/reg_loi/Ceres_Inquiry_BRS_Response.pdf	NO	200
Transgenic	Apple	Insertion of HcrVf1 complete gene (cisgenese) from apple, introduced via Agrobacteria	Wageningen UR, Plant Research International	APHIS - am i regulated	2012-04-02	https://www.aphis.usda.gov/biotechnology/downloads/reg_loi/schouten_email_022312.pdf https://www.aphis.usda.gov/biotechnology/downloads/reg_loi/aphis_response_schouten.pdf	NO	201
NGT2	Grapevine	Insertion of anthocyanin regulatory gene VvMybA1 of grapevine with grapvine derived 2S albumin promoter and terminator	University of Florida	APHIS - am i regulated	2012-04-02	https://www.aphis.usda.gov/biotechnology/downloads/reg_loi/USDA_APHIS_Cisgenic_Grape_Inquiry_020812.pdf https://www.aphis.usda.gov/biotechnology/downloads/reg_loi/Grapevine_Inquiry_BR_response_042412.pdf	NO	202
NGT1	Maize	Deletions (or small insertions) in IPK1	Dow AgroScience	APHIS - am i regulated	2012-03-08	https://www.aphis.usda.gov/biotechnology/downloads/reg_loi/DOW_Email_%20to_Susan_%20Kohler_032010.pdf https://www.aphis.usda.gov/biotechnology/downloads/reg_loi/DOW_ZFN_IPK1_052610.pdf https://www.aphis.usda.gov/biotechnology/downloads/reg_loi/APHIS_response_DOW_ZFN_IPK1_030812.pdf	YES	203
Not categorizable	Babys breath	Gene insertion (CBI) with CBI method	Danziger Flower Farm	APHIS - am i regulated	2011-12-16	https://www.aphis.usda.gov/biotechnology/downloads/reg_loi/Danziger_USDA_012012.pdf https://www.aphis.usda.gov/biotechnology/downloads/reg_loi/Response_Babysbreath_122011.pdf	Not categorizable	204
NGT1	Tobacco	Insertion of transgene (FT gene) and segregating this transgene out	North Carolina State University	APHIS - am i regulated	2011-10-27	https://www.aphis.usda.gov/biotechnology/downloads/reg_loi/Lewis%20Inquiry%20to%20BRS%20-%2022%20Jan%2011.pdf https://www.aphis.usda.gov/biotechnology/downloads/reg_loi/Dr%20Ramsey%20S%20Lewis%20NCSC%20Final.pdf	Not categorizable	205
NGT1	Plum	Insertion of transgene (pFT) and segregating this transgene out	USDA ARS	APHIS - am i regulated	2011-10-27	https://www.aphis.usda.gov/biotechnology/downloads/reg_loi/Scorza%20Letter%20-%20Jan%2011.pdf https://www.aphis.usda.gov/biotechnology/downloads/reg_loi/Drs%20Scorza%20and%20Callahan%20Final.pdf	Not categorizable	206
Transgenic	Kentucky bluegrass	Insertion of transgene for glyphosate resistance (EPSPS)	Scotts Miracle-Gro Company	APHIS - am i regulated	2011-07-01	https://www.aphis.usda.gov/brs/aphisdocs/scotts_kbg.pdf https://www.aphis.usda.gov/brs/aphisdocs/scotts_kbg_resp.pdf	NO	207
inferred NGT1	Rice or Tobacco	Deletions or substitution of some nuleotides (e.g. in Pi29 gene)	Cellecitis S.A./Cellectis Plant Sciences	APHIS - am i regulated	2011-01-16	https://www.aphis.usda.gov/biotechnology/downloads/reg_loi/Thenell_Cellectis_meganuclease_090911.pdf https://www.aphis.usda.gov/biotechnology/downloads/reg_loi/Response_Thenell_meganuclease_122011.pdf	YES	208
